# Supplementary material for: Identifying climate model structural inconsistencies allows for tight constraint of aerosol radiative forcing
Source: Copernicus journal article supplement (doi:10.5194/acp-23-8749-2023), 2023-08-08
Supplement: Supplementary file 1 [file acp-23-8749-2023-supplement.pdf]

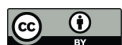

*Supplement of*

## **Identifying climate model structural inconsistencies allows for tight constraint of aerosol radiative forcing**

**Leighton A. Regayre et al.**

*Correspondence to:* Leighton A. Regayre (l.a.regayre@leeds.ac.uk)

The copyright of individual parts of the supplement might differ from the article licence.

**This PDF file includes:**

Figures S1 to S30  
Tables S1 to S4

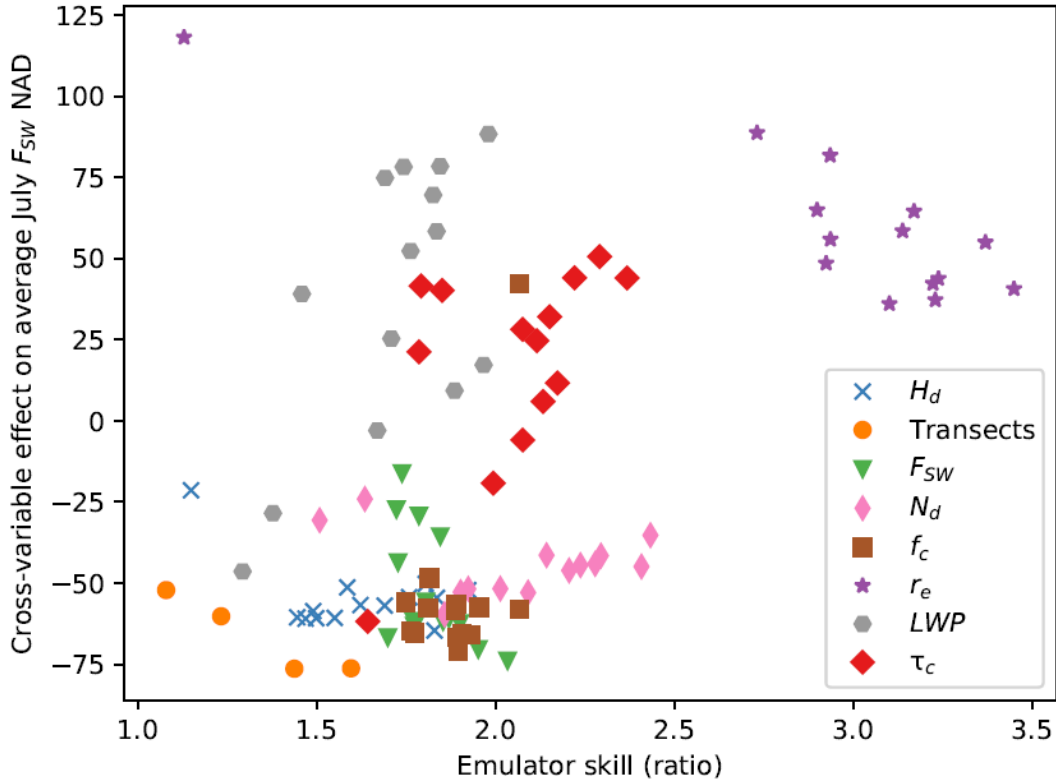

**Fig. S1. Emulator skill for North Atlantic constraint variables and  $H_d$ , and cross-variable effects on average July  $F_{sw}$  NAD, which correspond to the shading in Fig. 5 of the main article (where  $F_{sw}$  is the constrained constraint variable in the subfigure). Emulator skill is quantified as the ratio of the standard deviation in emulator output across our 1 million model variants, to the mean emulator standard deviation corresponding to each variant (parameter combination). Emulator skill larger than 1 suggests emulated values accurately represent model output.**

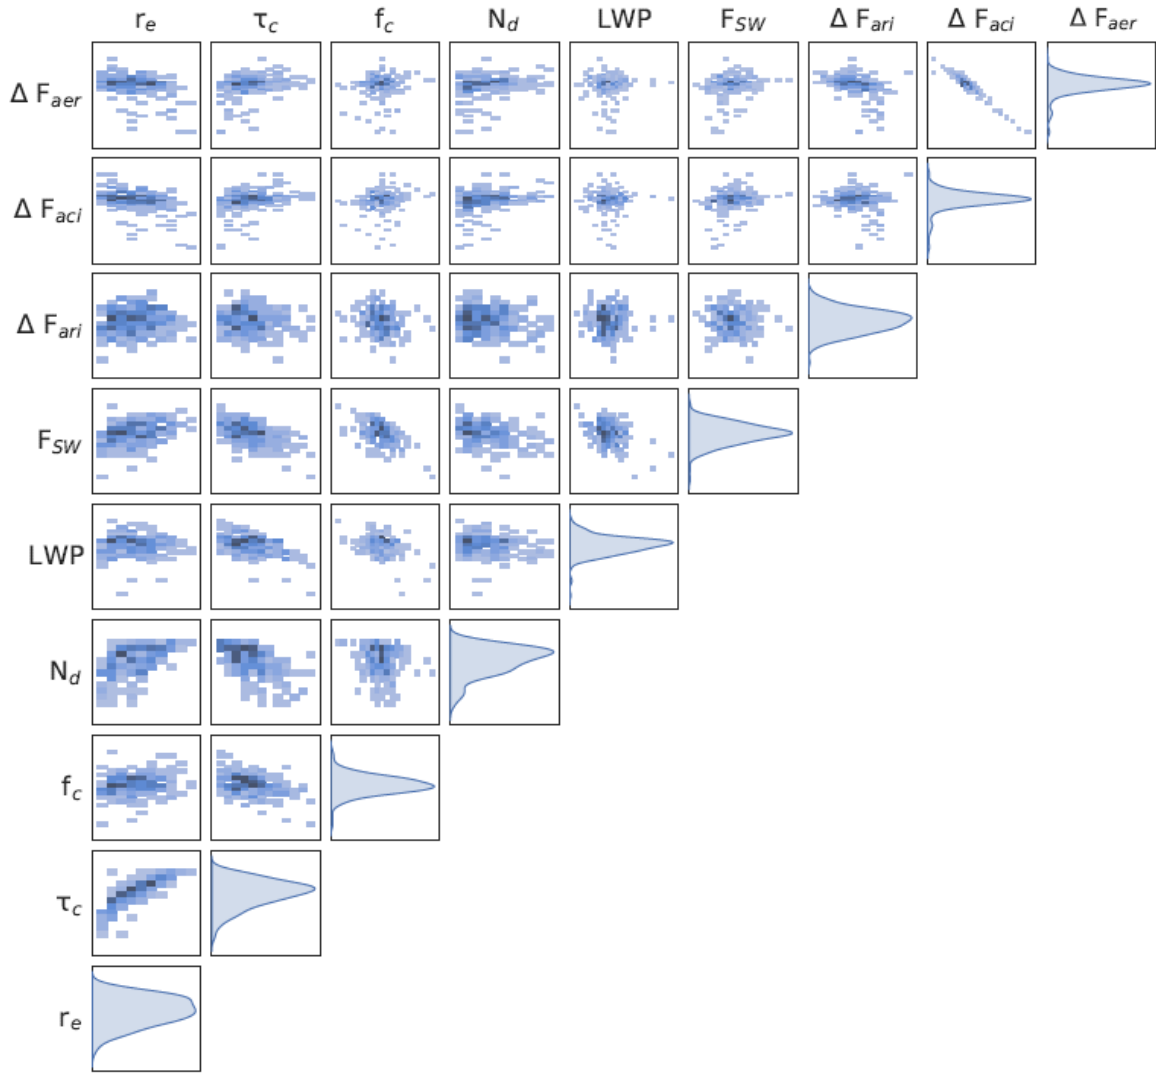

**Fig. S2: Density plots of global, annual mean output from 221 PPE members for  $\Delta F_{aer}$ ,  $\Delta F_{aci}$ ,  $\Delta F_{ari}$ , and global mean  $F_{SW}$ , LWP,  $N_d$ ,  $f_c$ ,  $\tau_c$  and  $r_e$ . Diagonal panels show probability density functions for individual variables.**

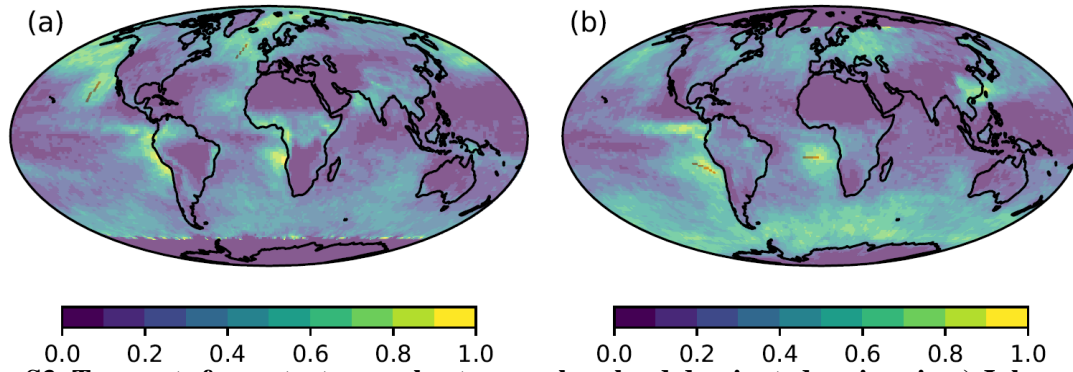

**Fig. S3: Transects from stratocumulus to cumulus cloud dominated regions in a) July and b) November, superimposed on MODIS liquid cloud fraction values for the corresponding month.**

### North Atlantic transect constraint variables

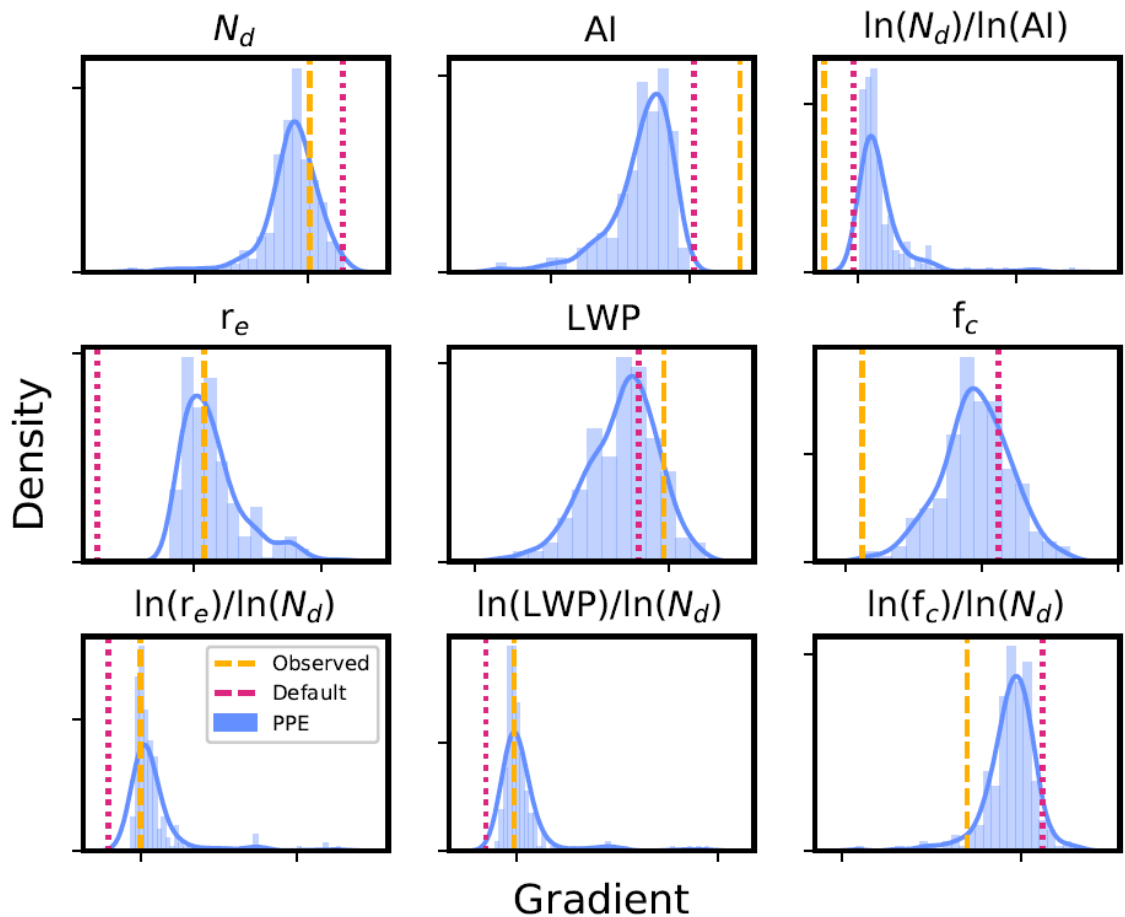

Fig. S4: Probability density functions of North Atlantic transect constraint variables.

# North Pacific transect constraint variables

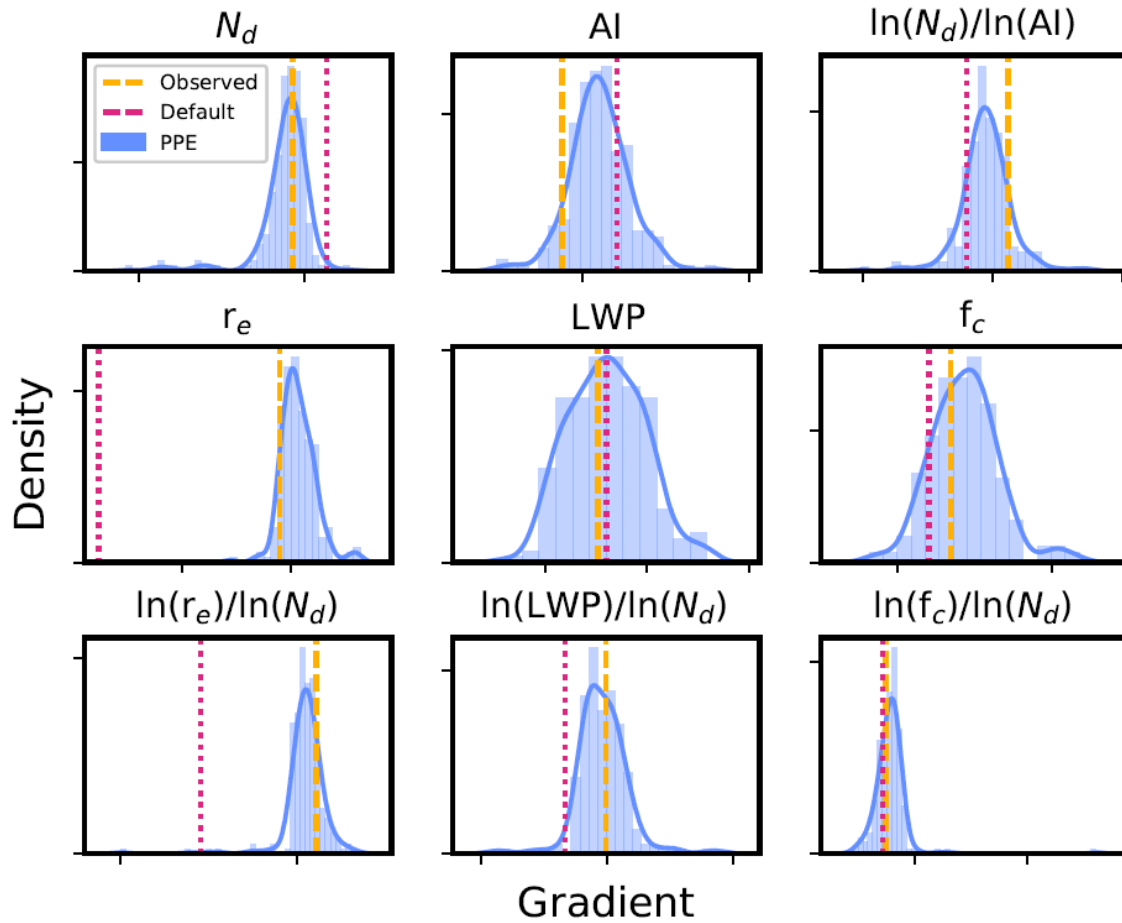

Fig. S5: Probability density functions of North Pacific transect constraint variables.

### South Atlantic transect constraint variables

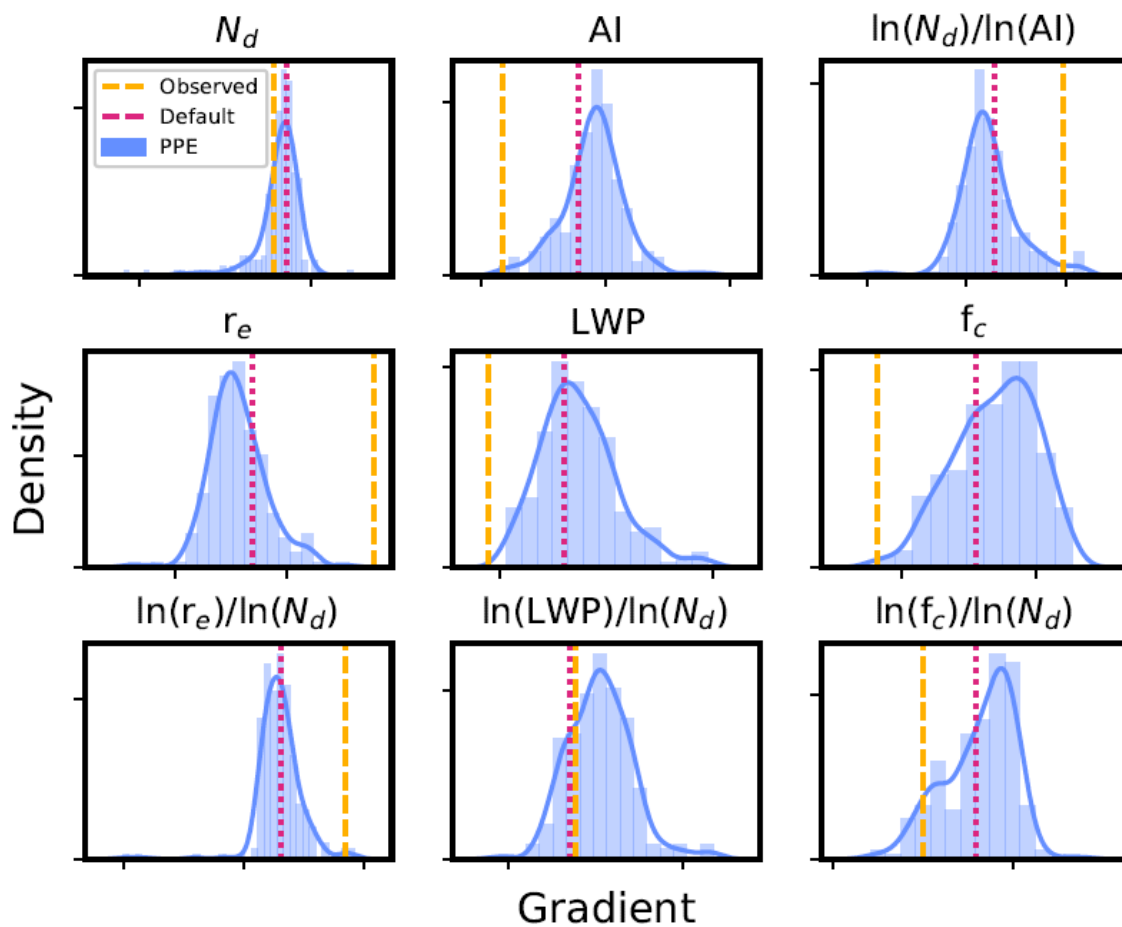

Fig. S6: Probability density functions of South Atlantic transect constraint variables.



### South Pacific transect constraint variables

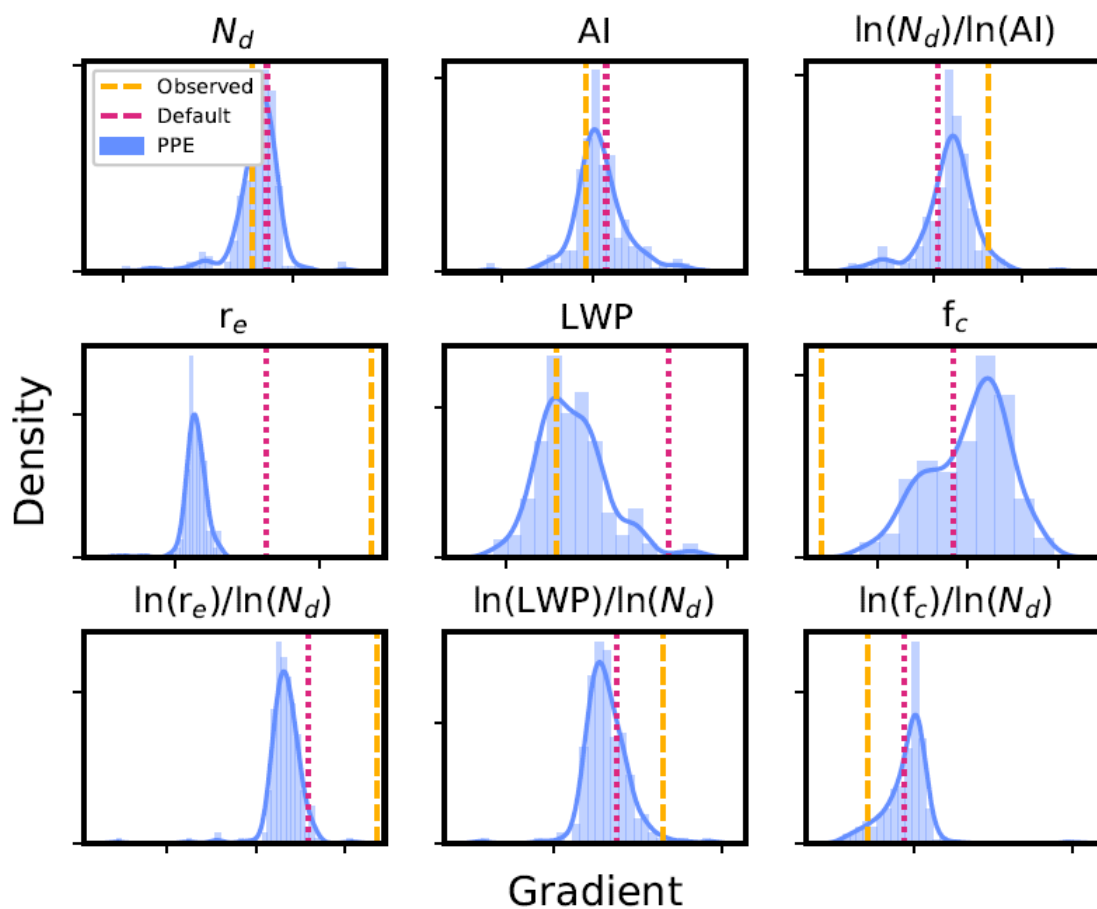

Fig. S7: Probability density functions of South Pacific transect constraint variables.

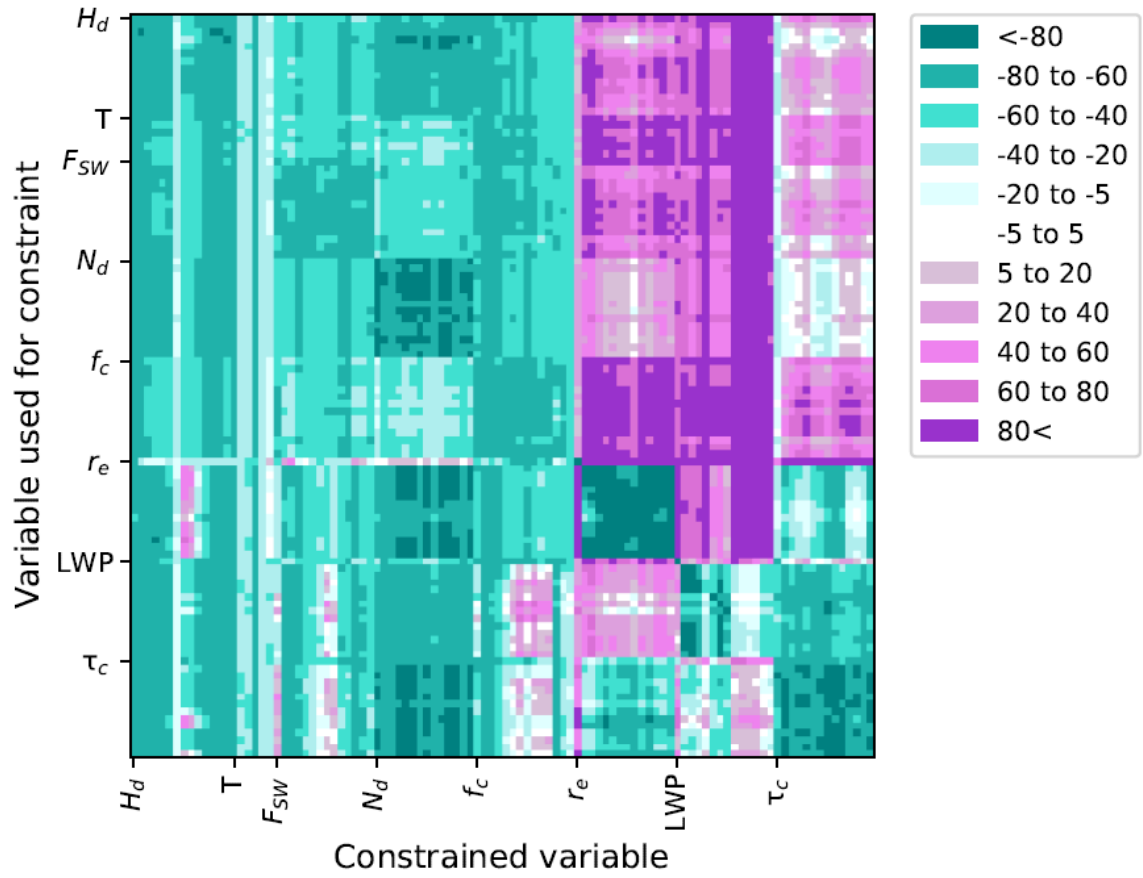

**Fig. S8: Pairwise comparisons of North Pacific and  $H_d$  constraint variables. Figure features are identical with Fig. 5.**

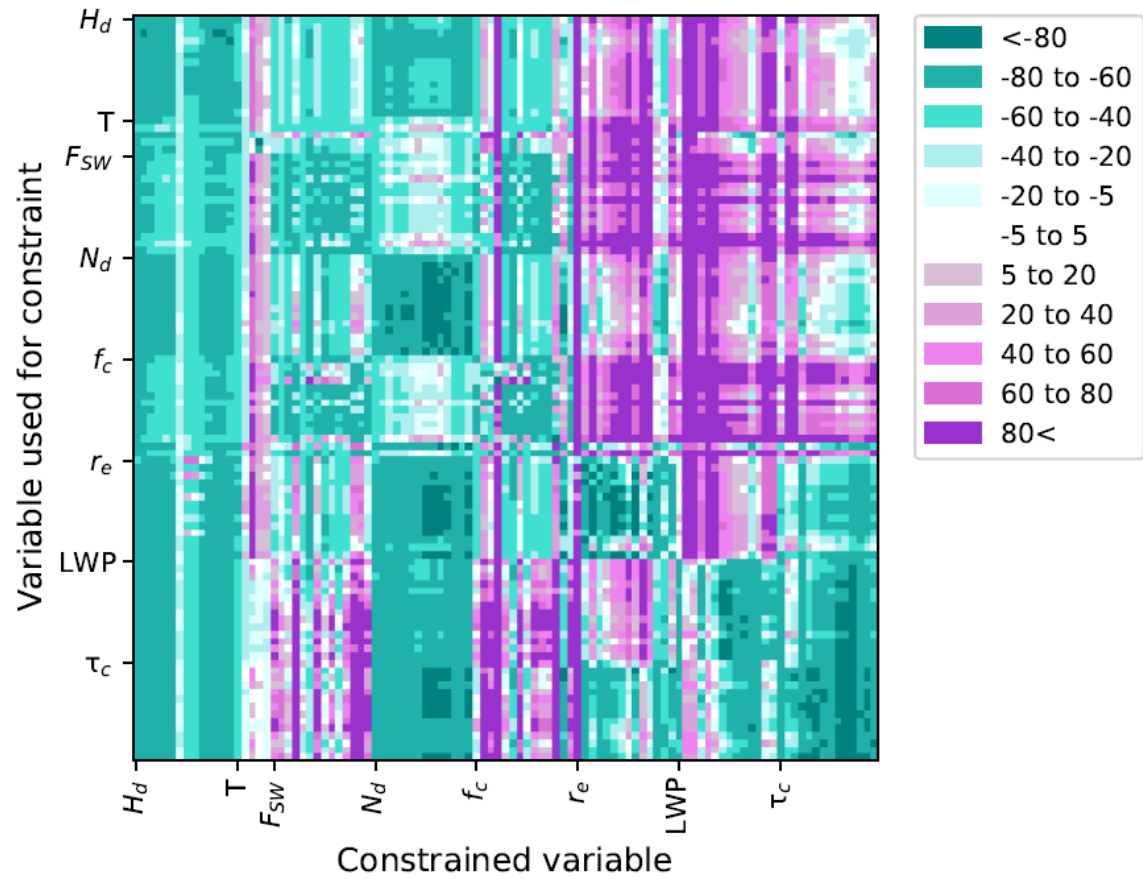

**Fig. S9: Pairwise comparisons of South Atlantic and  $H_d$  constraint variables. Figure features are identical with Fig. 5.**

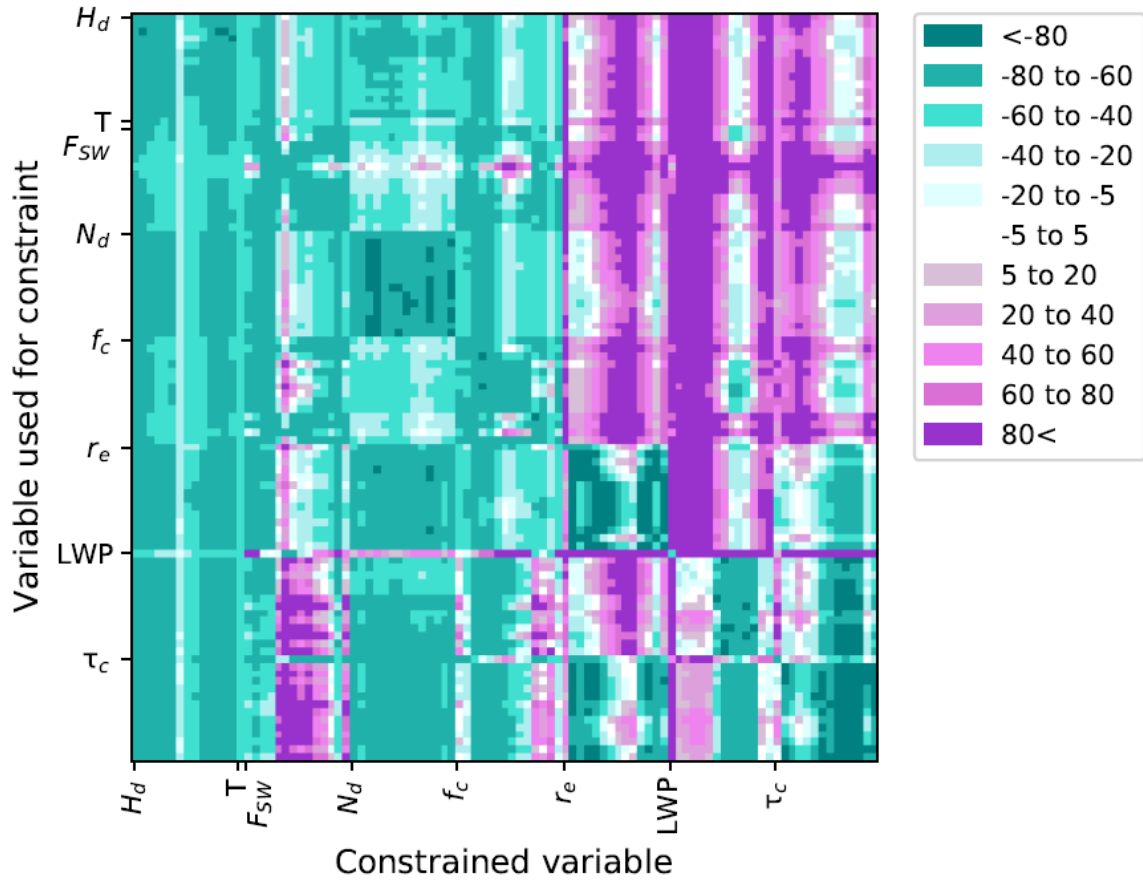

**Fig. S10: Pairwise comparisons of South Pacific and  $H_d$  constraint variables. Figure features are identical with Fig. 5.**

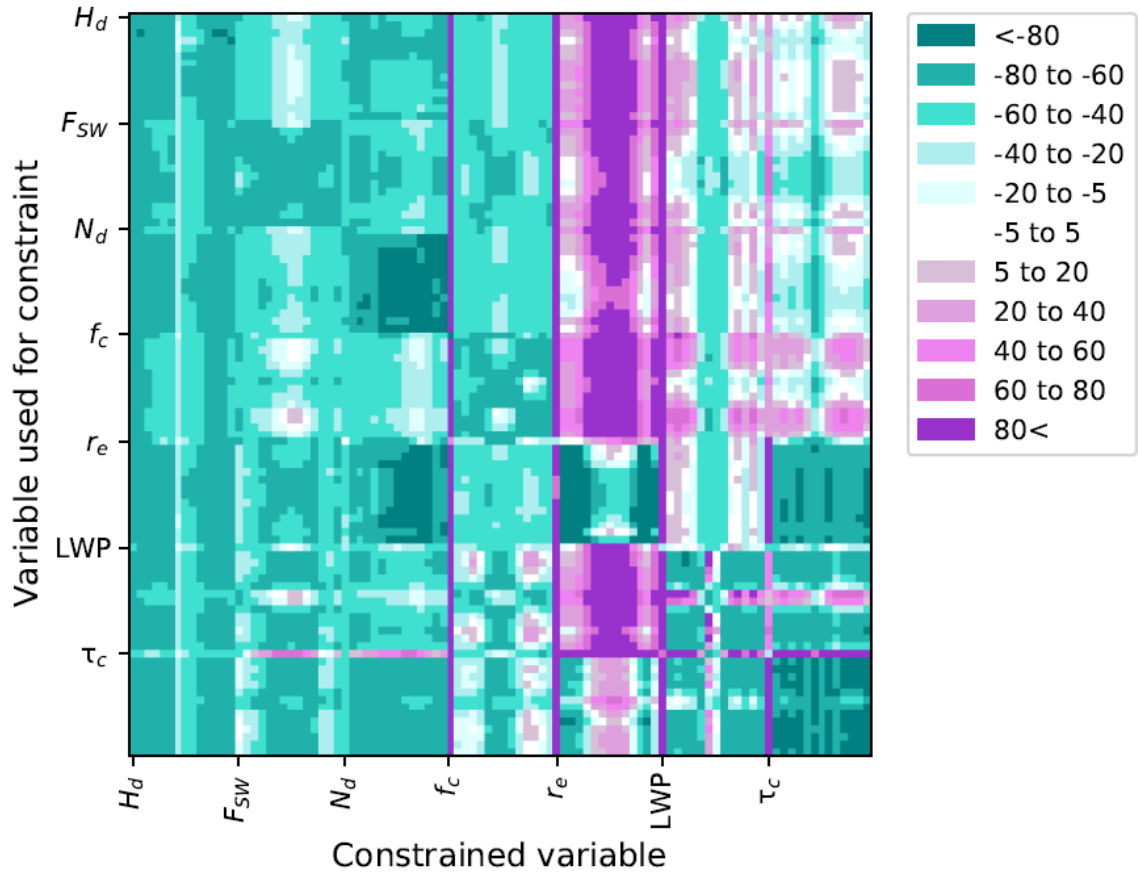

**Fig. S11: Pairwise comparisons of Southern Ocean and  $H_d$  constraint variables. Figure features are identical with Fig. 5.**

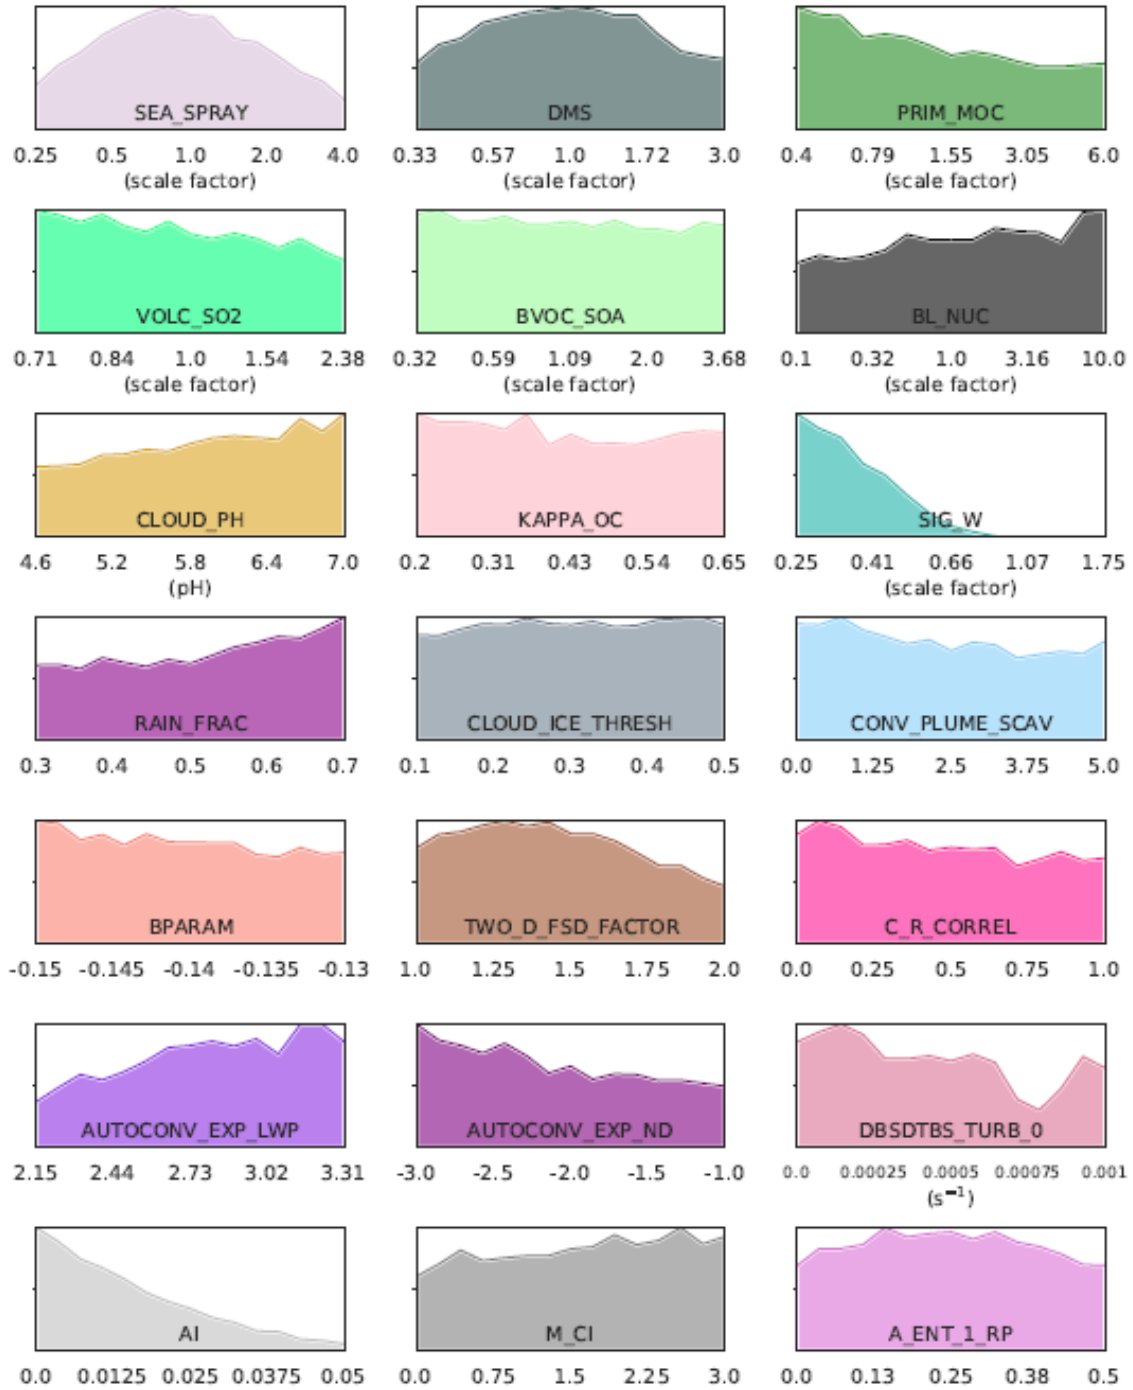

**Fig. S12: Probability density functions of model parameters after constraint using our optimal set of constraint variables. In the original sample of 1 million model variants, these pdfs would be uniformly distributed on this scale. Non-shaded sections indicate a proportion of model variants with corresponding parameter values have been ruled out as implausible.**

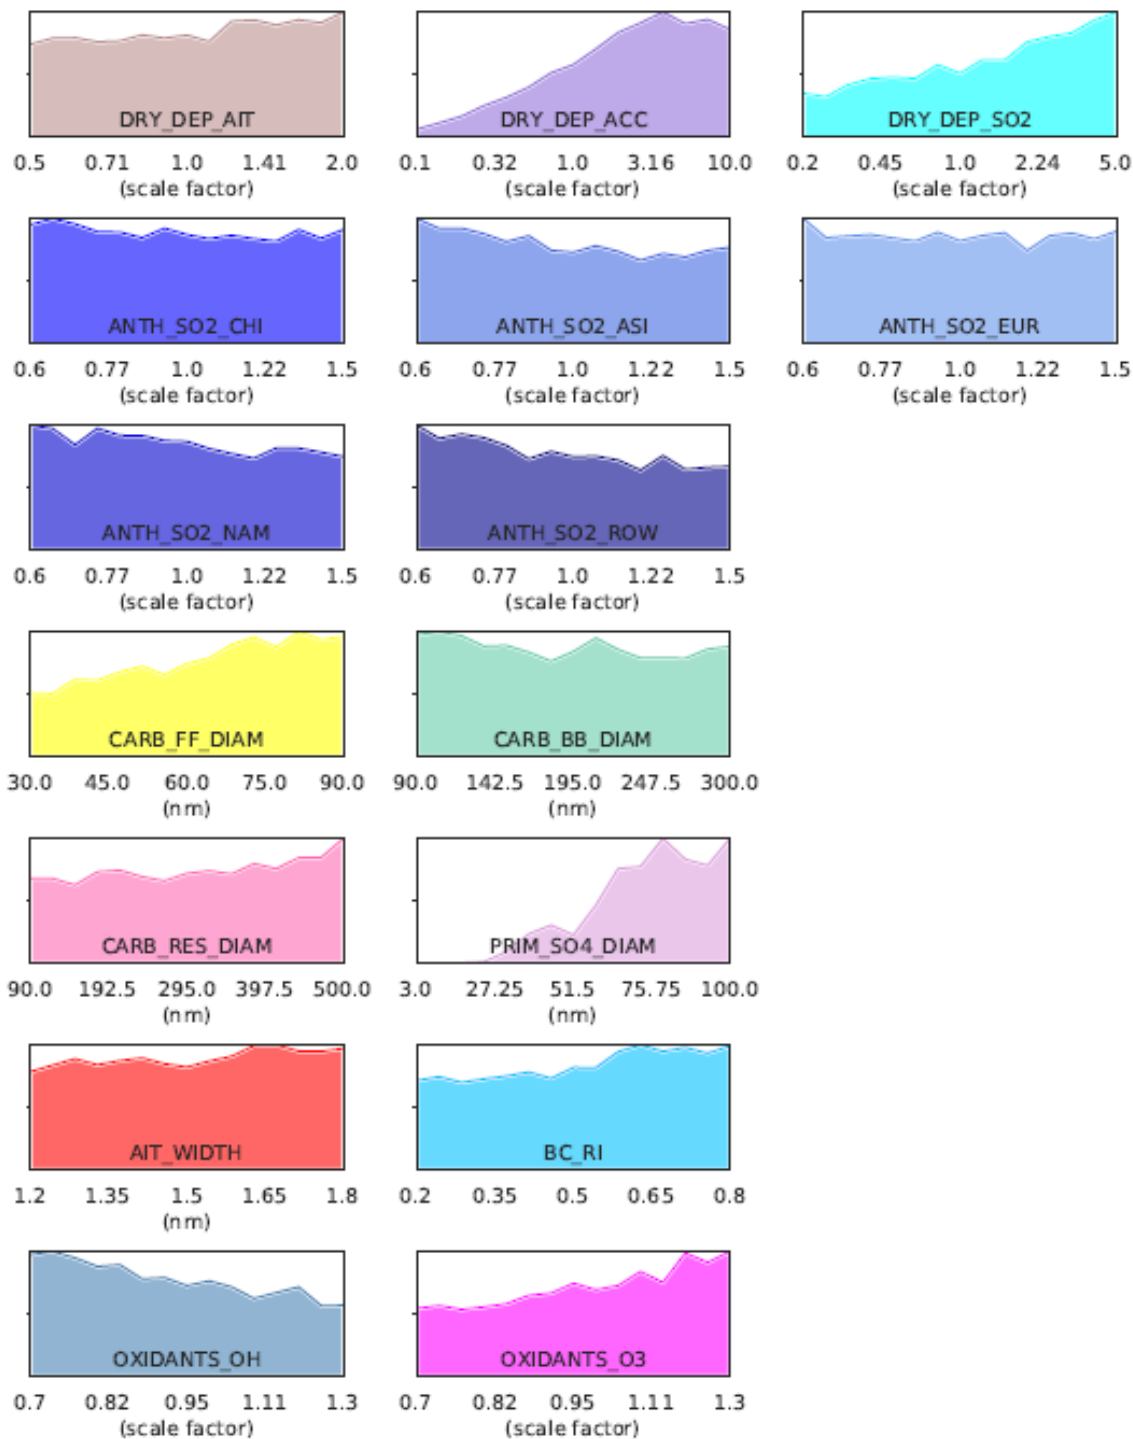

**Fig. S13: Probability density functions of model parameters after constraint using our optimal set of constraint variables. Features are identical to SI Fig. S12.**

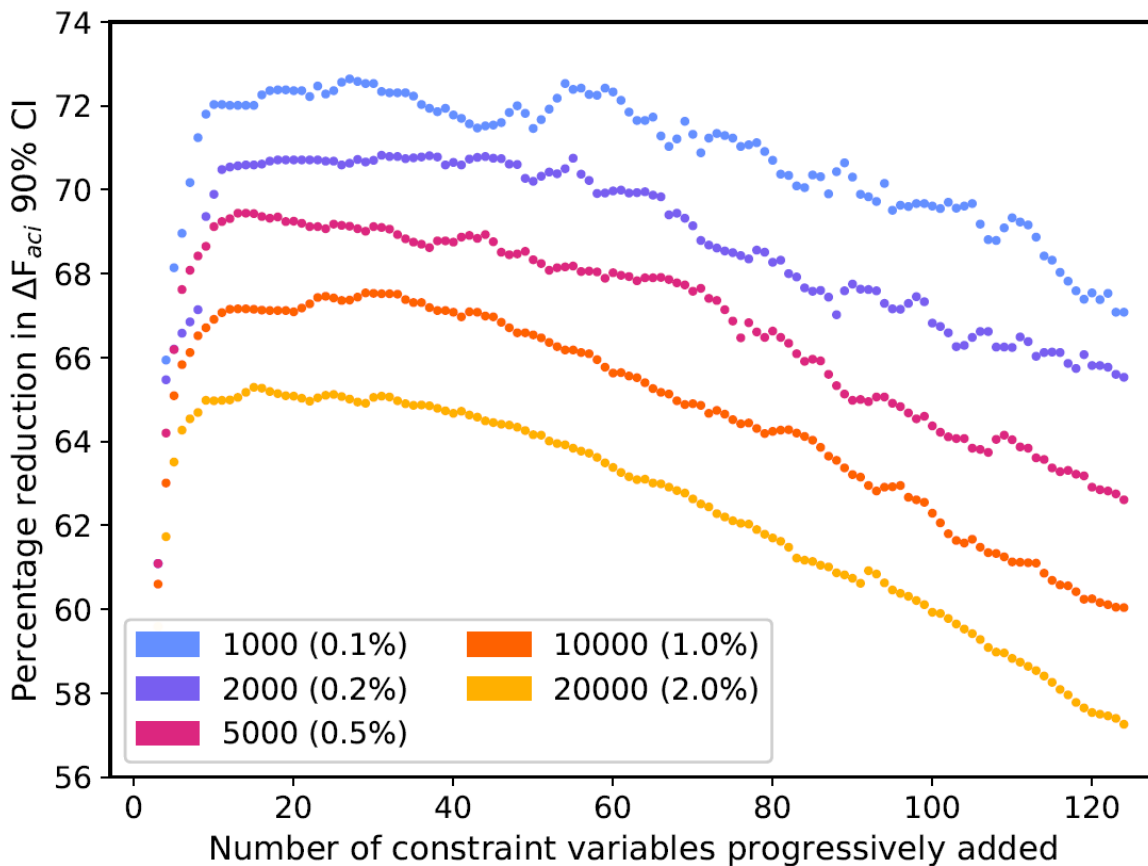

**Fig. S14: Constraint of  $\Delta F_{aci}$  and the effect of varying the number of constraint variables used and the number of model variants retained (percentage of original 1 million) at each stage of the constraint (legend). The constraints achieved by retaining 5000 model variants at each stage is identical to the constraints shown in Fig. 6.**



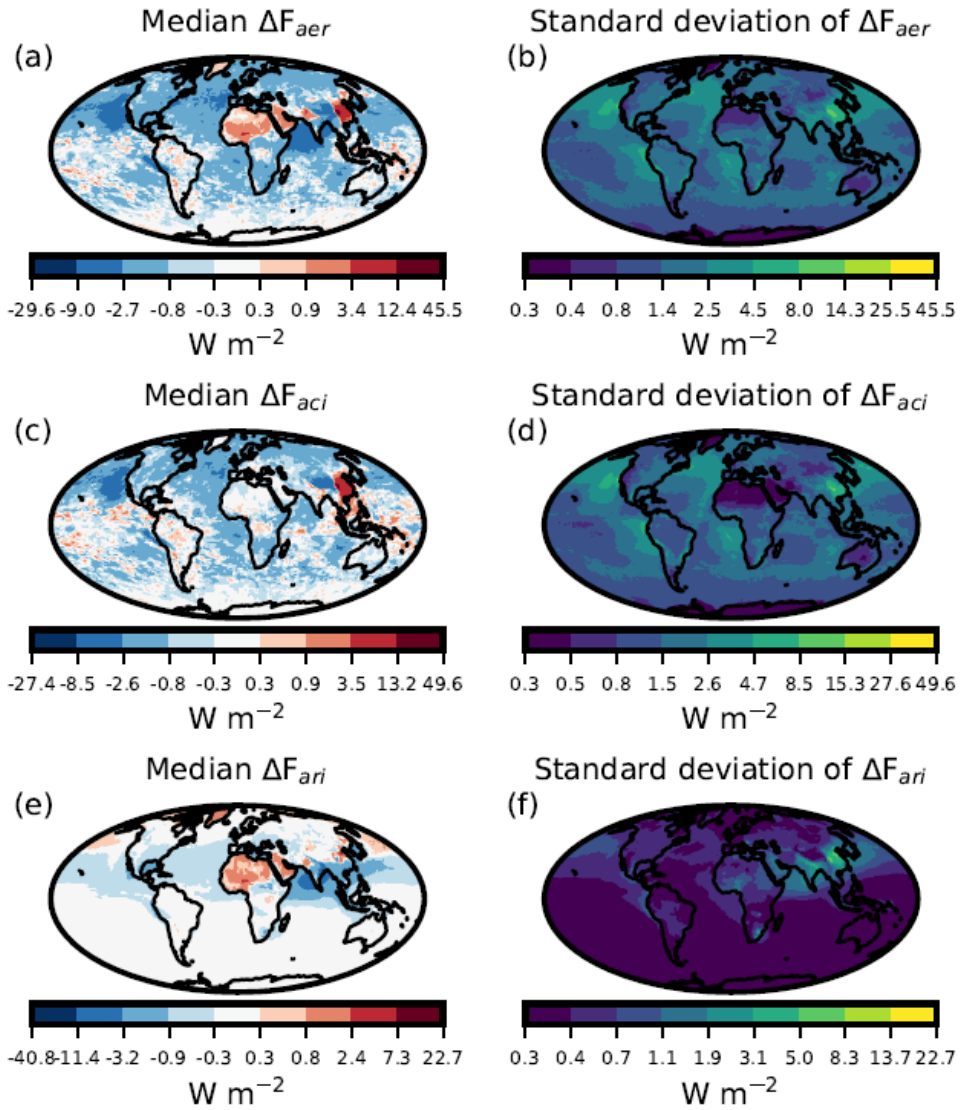

**Fig. S15: Median and standard deviations of annual mean  $\Delta F_{aer}$ ,  $\Delta F_{aci}$  and  $\Delta F_{ari}$ , across the 221 PPE members. Values were calculated in each model grid box independently.**

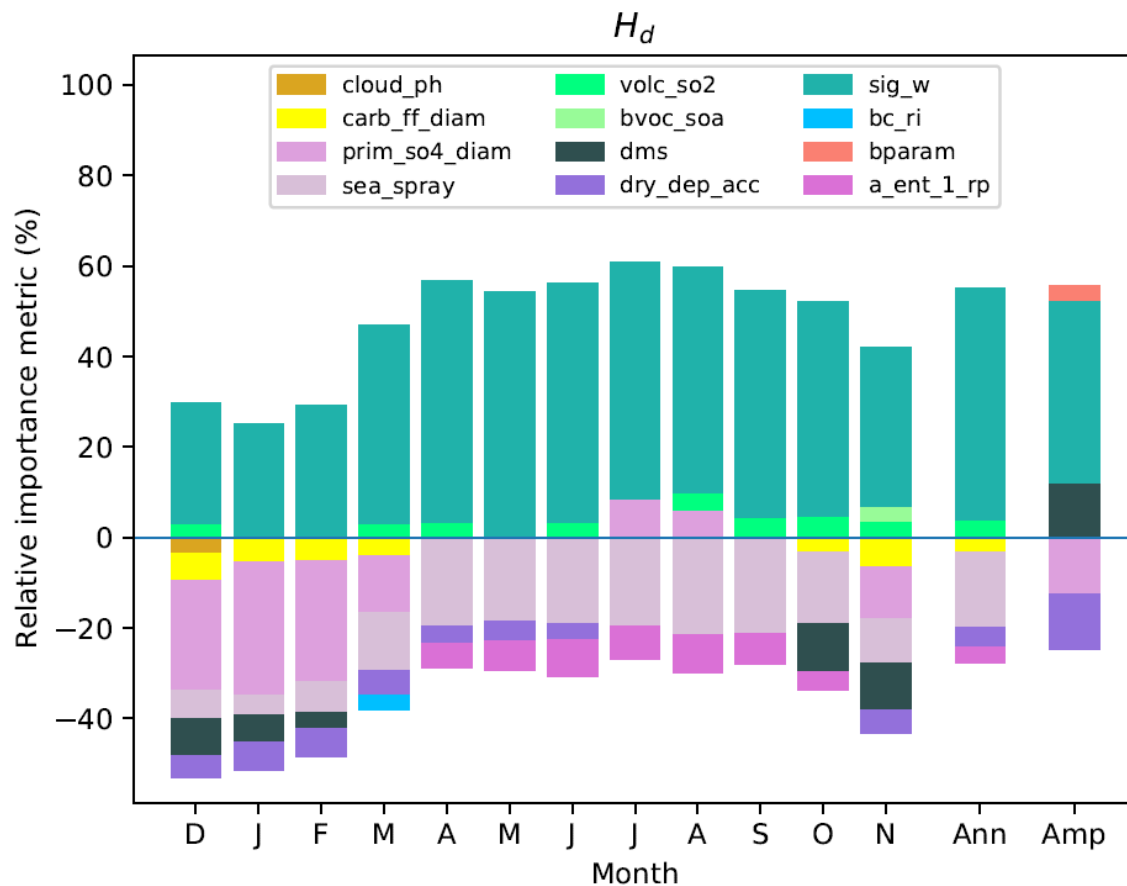

**Fig. S16: Relative importance of model parameters as causes of uncertainty in  $H_d$ .** Relative importance metrics are calculated for each month (December 2016 to November 2017), for the annual mean (Ann) and the seasonal amplitude (Amp). Relative importance metrics lower than 4% are not shown.

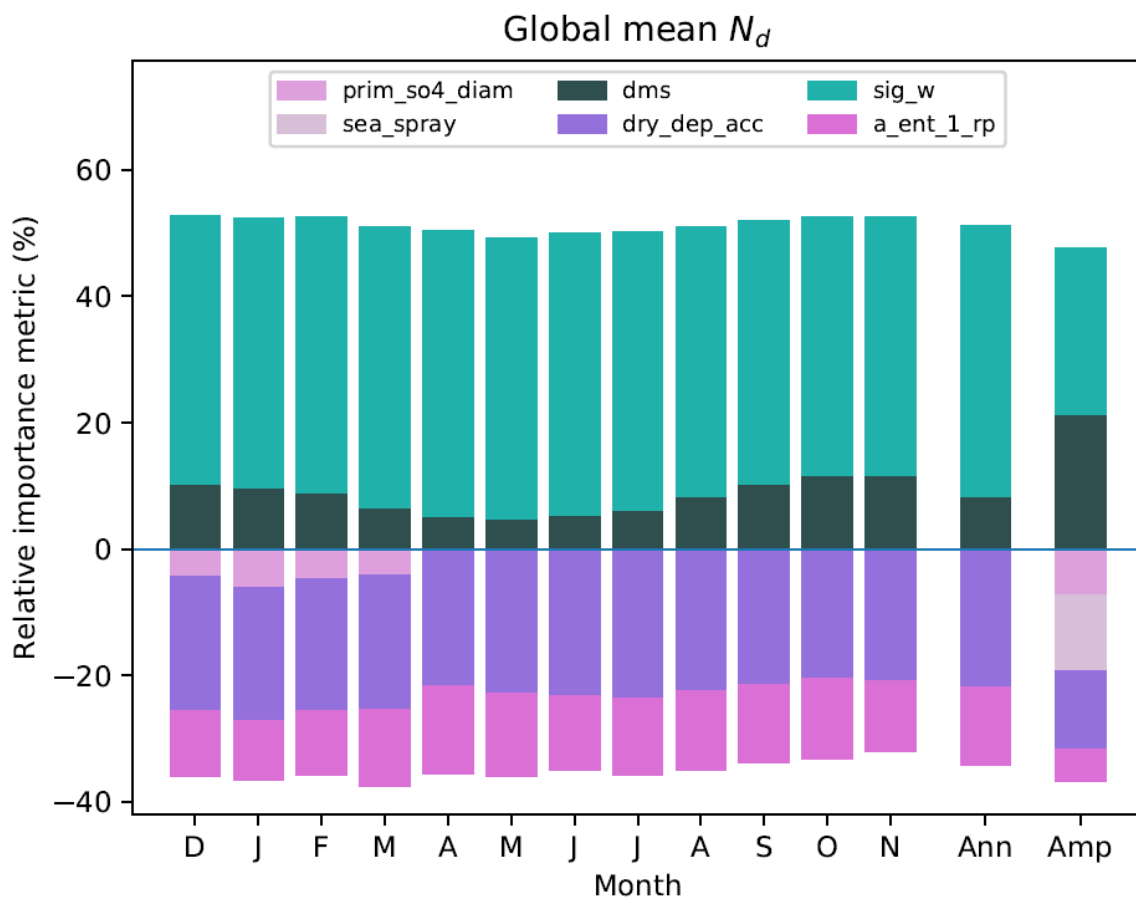

**Fig. S17: Relative importance of model parameters as causes of uncertainty in global mean  $N_d$ . Figure features are identical to SI Fig. S16.**

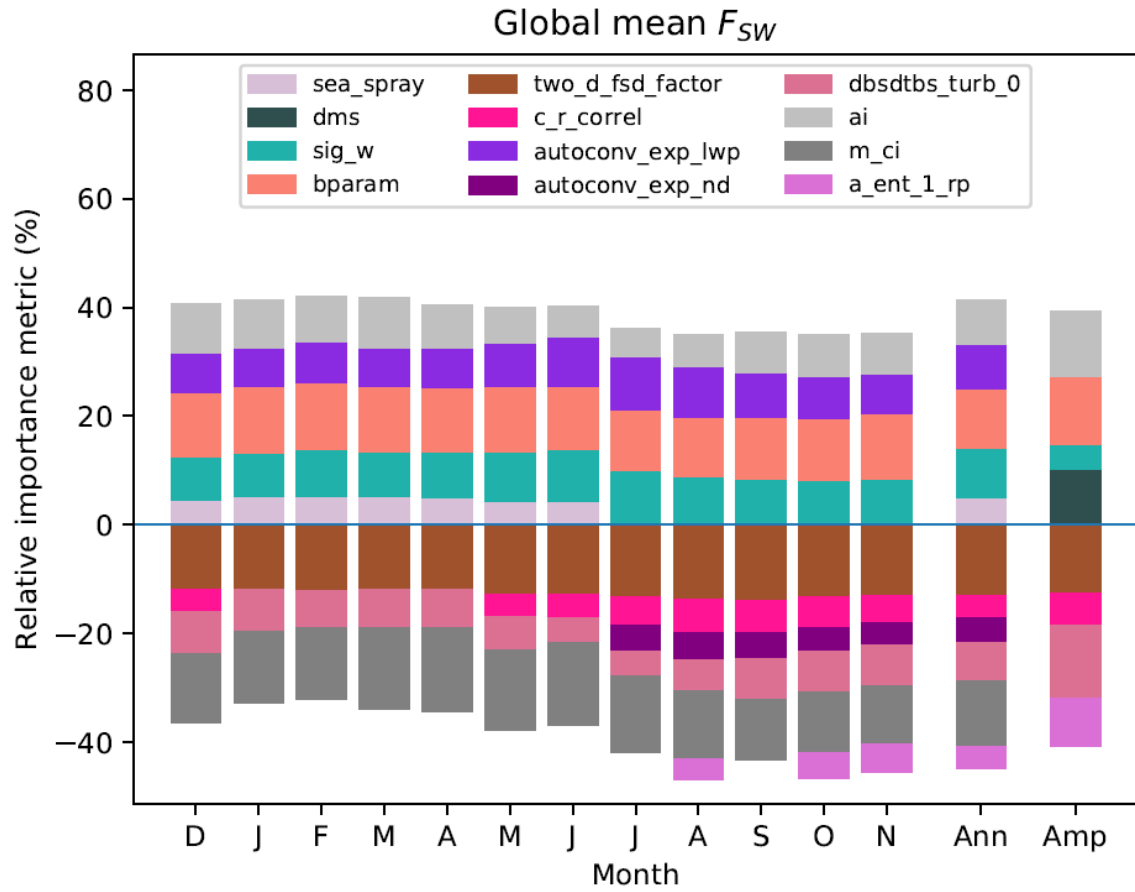

**Fig. S18: Relative importance of model parameters as causes of uncertainty in global mean  $F_{SW}$ . Figure features are identical to SI Fig. S16.**

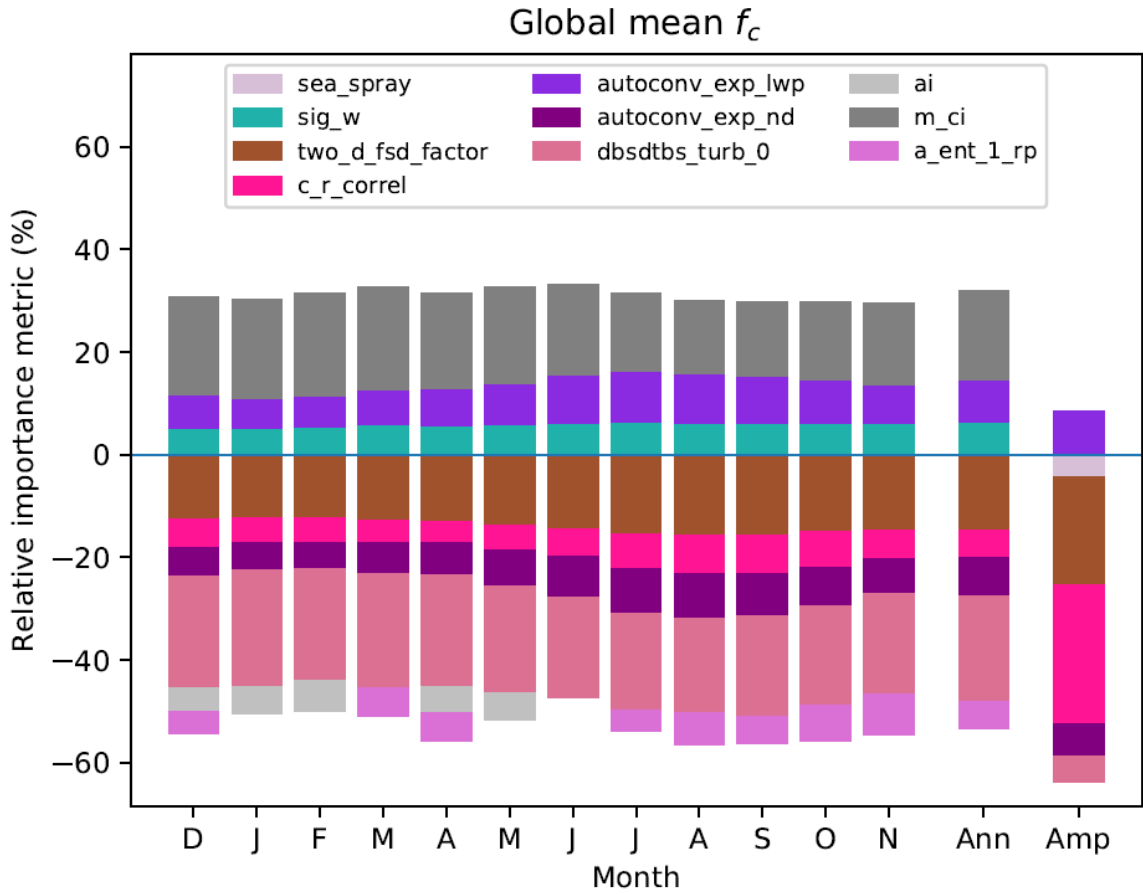

**Fig. S19: Relative importance of model parameters as causes of uncertainty in global mean  $f_c$ . Figure features are identical to SI Fig. S16.**

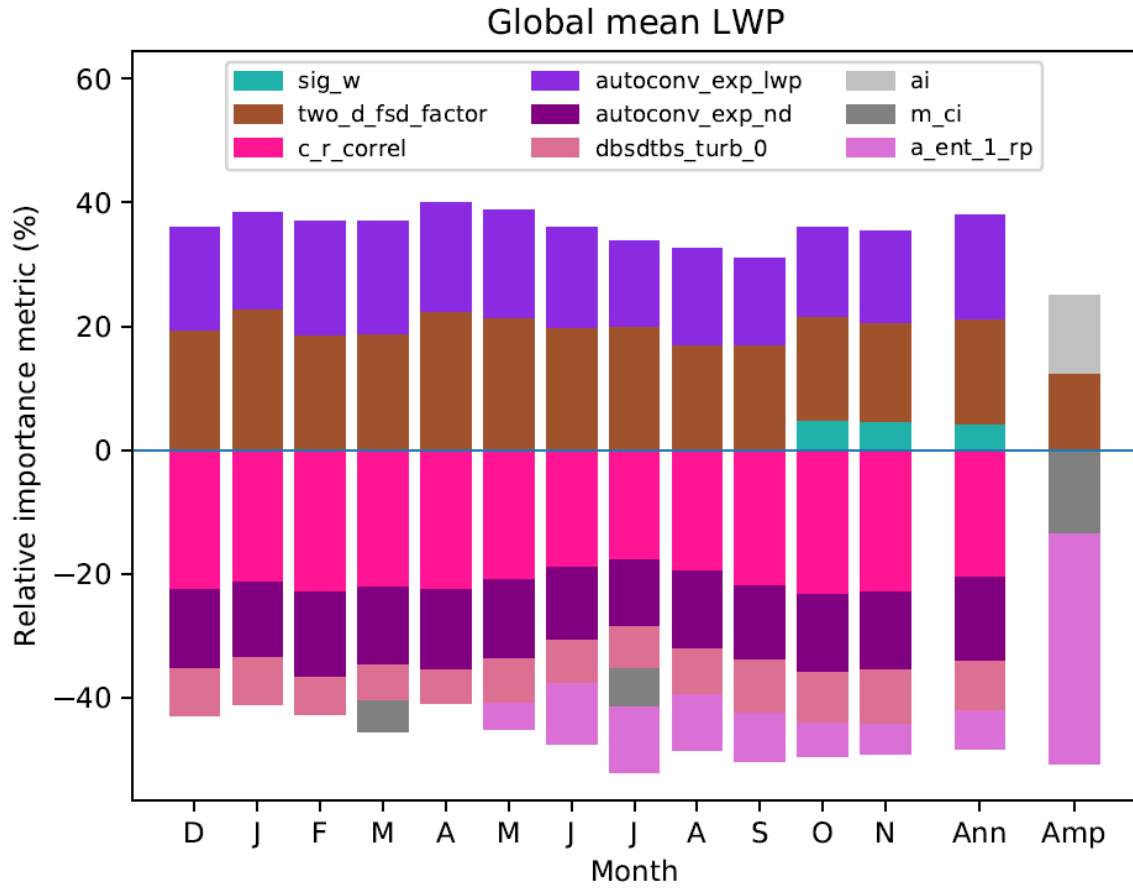

**Fig. S20: Relative importance of model parameters as causes of uncertainty in global mean LWP. Figure features are identical to SI Fig. S16.**

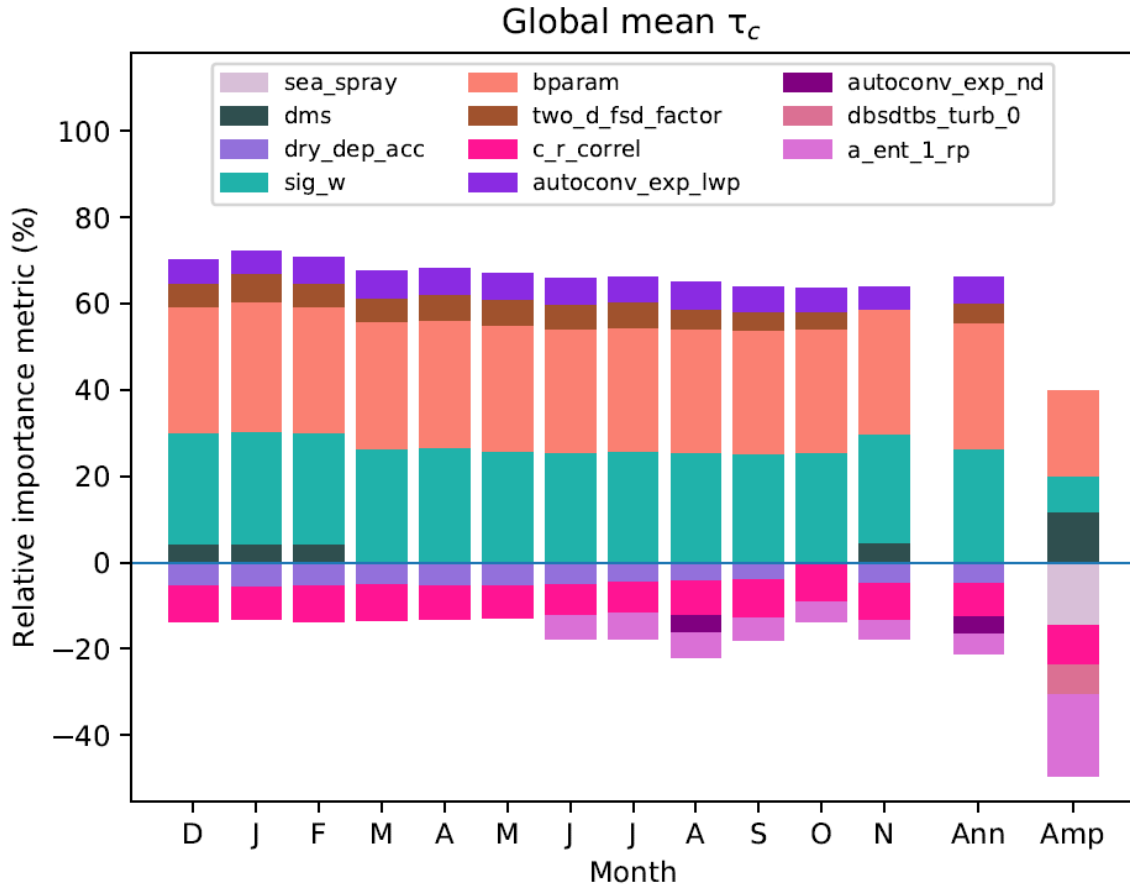

**Fig. S21: Relative importance of model parameters as causes of uncertainty in global mean  $\tau_c$ . Figure features are identical to SI Fig. S16.**

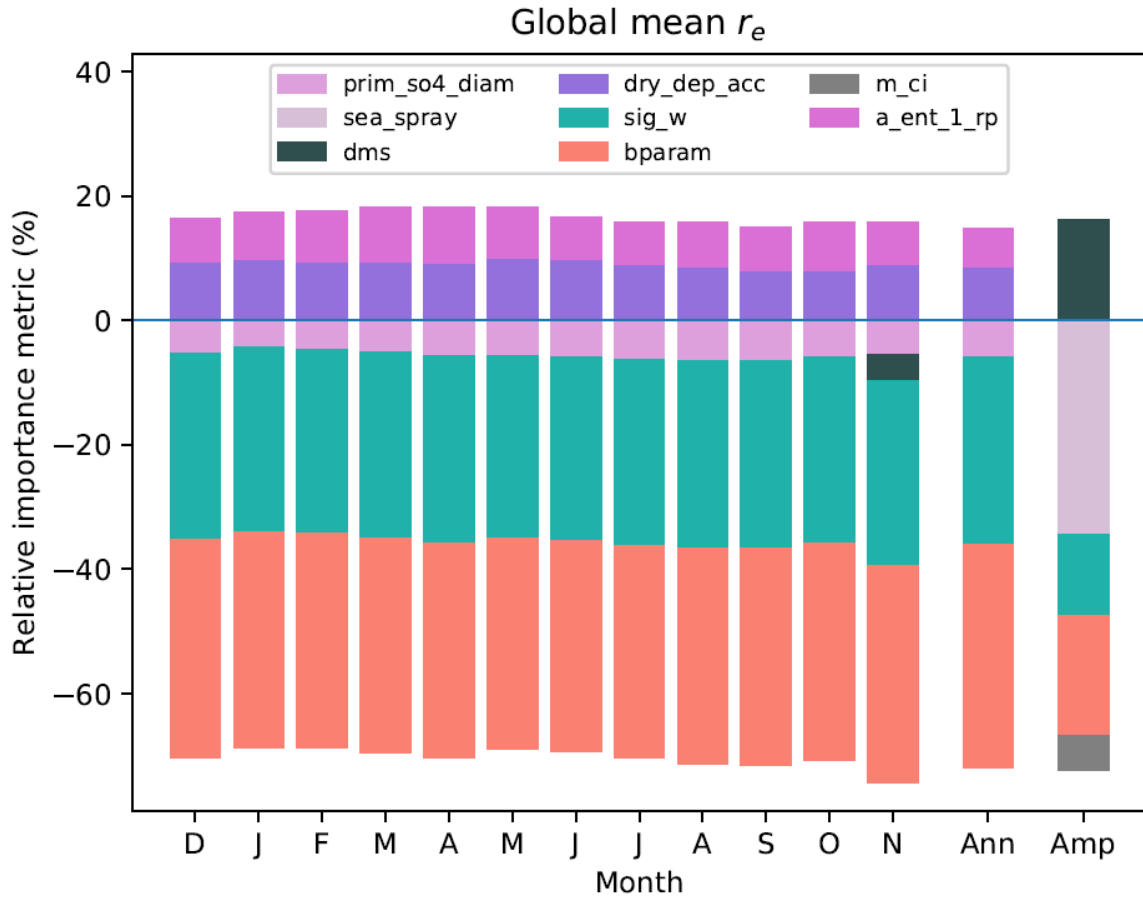

**Fig. S22: Relative importance of model parameters as causes of uncertainty in global mean  $r_e$ . Figure features are identical to SI Fig. S16.**



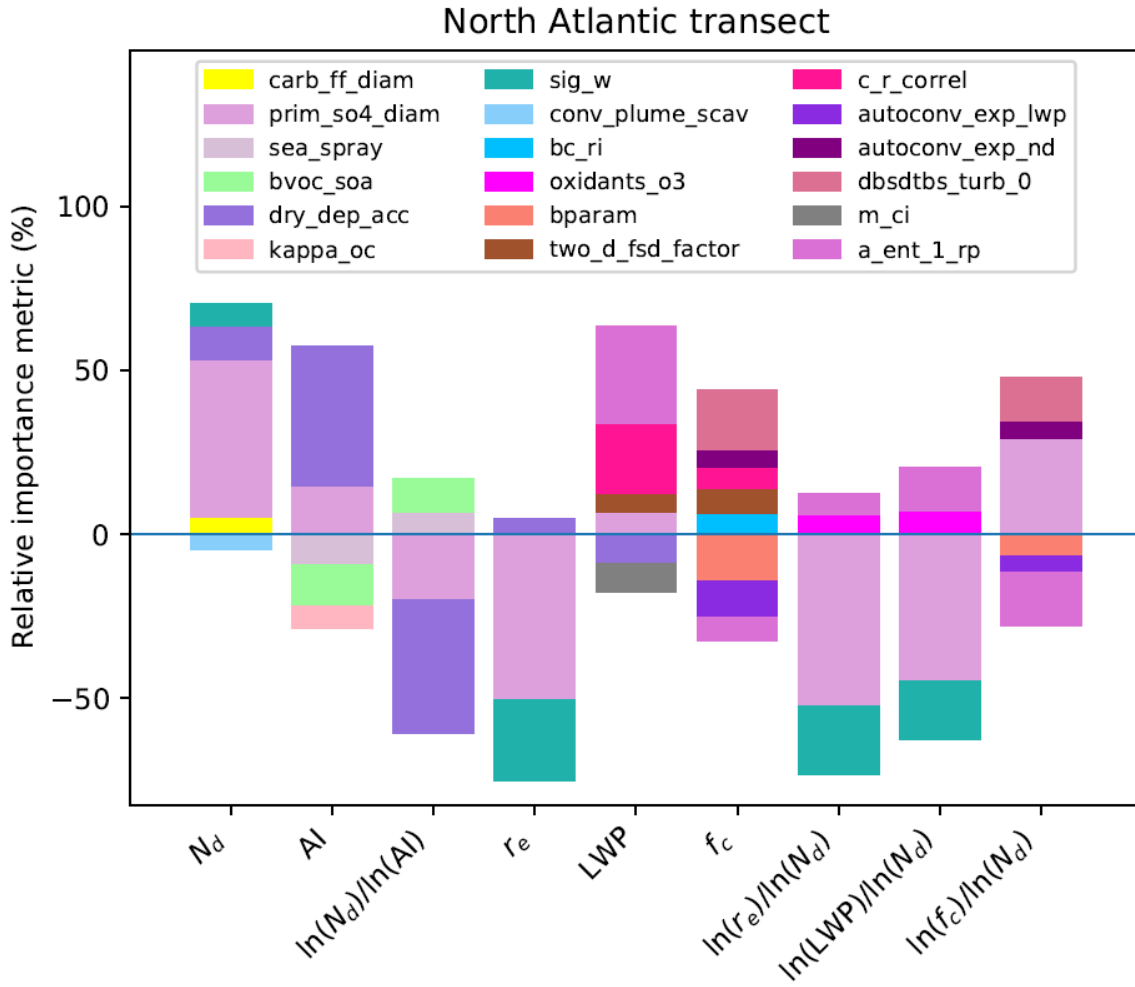

**Fig. S23: Relative importance of model parameters as causes of uncertainty in North Atlantic transect constraint variables. Figure features are identical to SI Fig. S16.**

### North Pacific transect

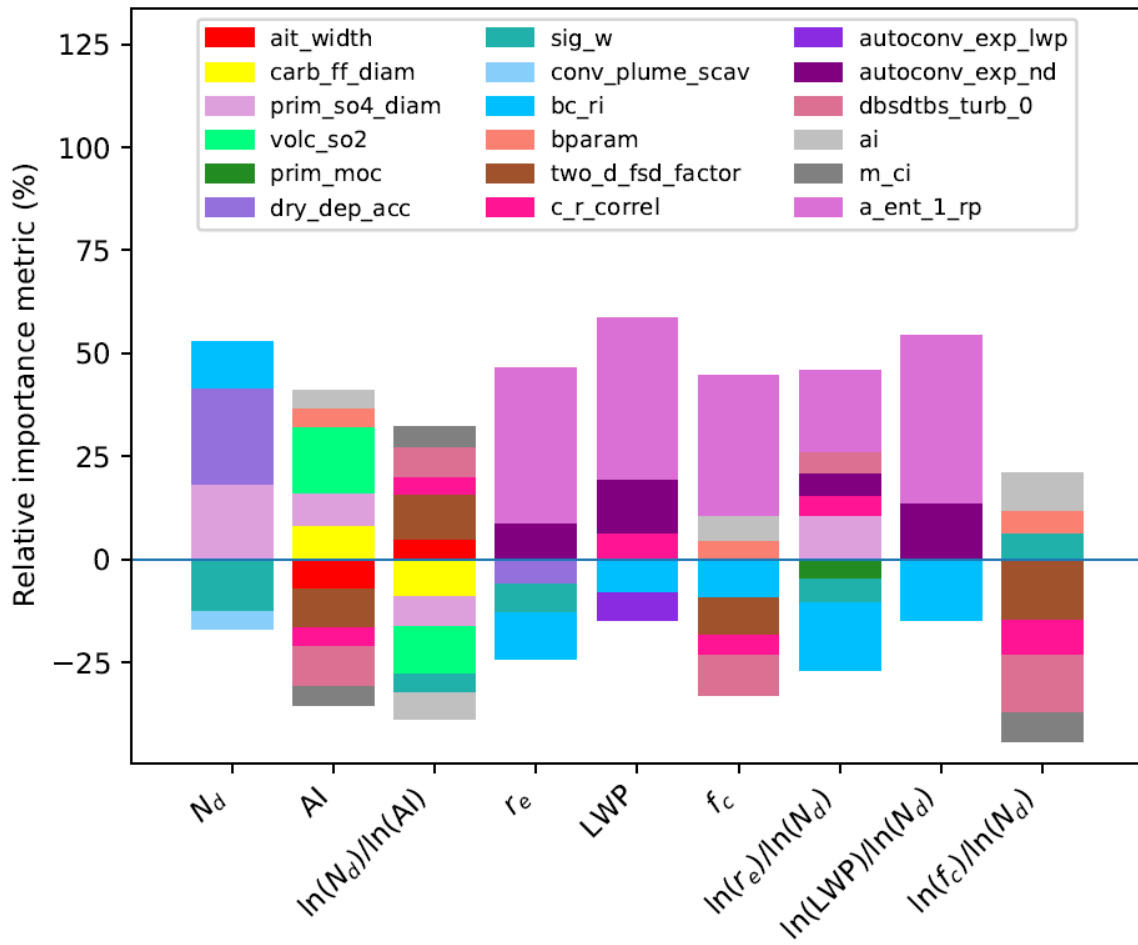

**Fig. S24: Relative importance of model parameters as causes of uncertainty in North Pacific transect constraint variables. Figure features are identical to SI Fig. S16.**

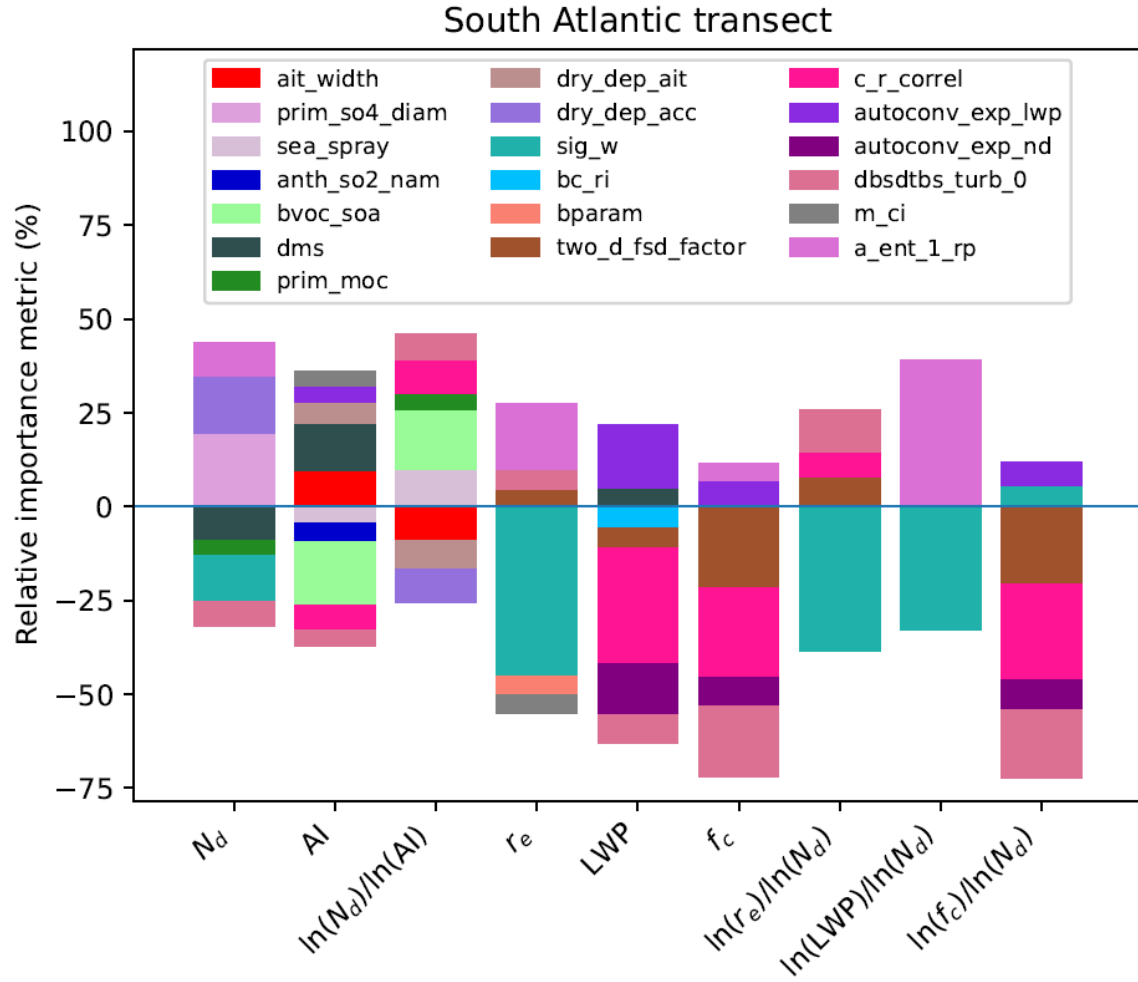

**Fig. S25: Relative importance of model parameters as causes of uncertainty in South Atlantic transect constraint variables. Figure features are identical to SI Fig. S16.**

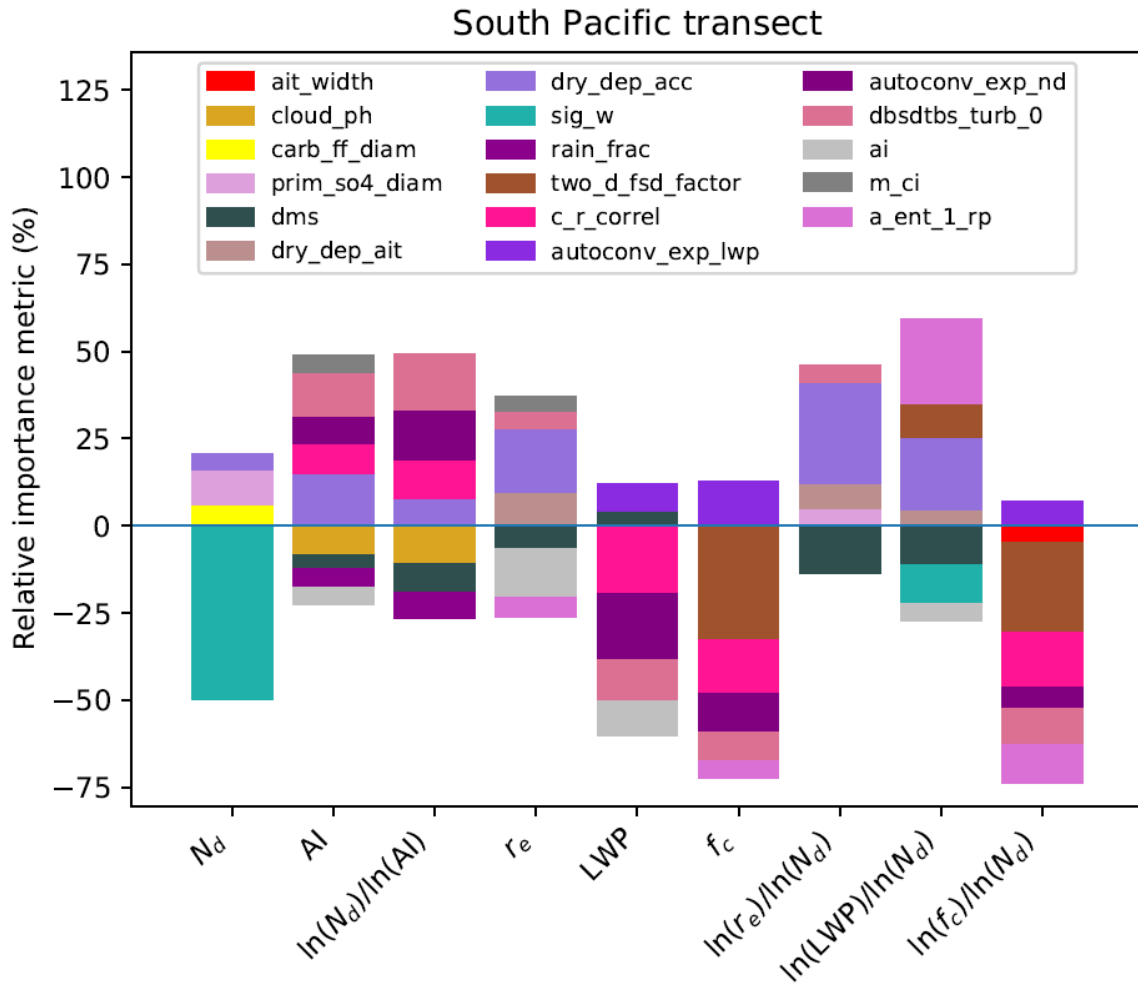

**Fig. S26: Relative importance of model parameters as causes of uncertainty in South Pacific transect constraint variables. Figure features are identical to SI Fig. S16.**

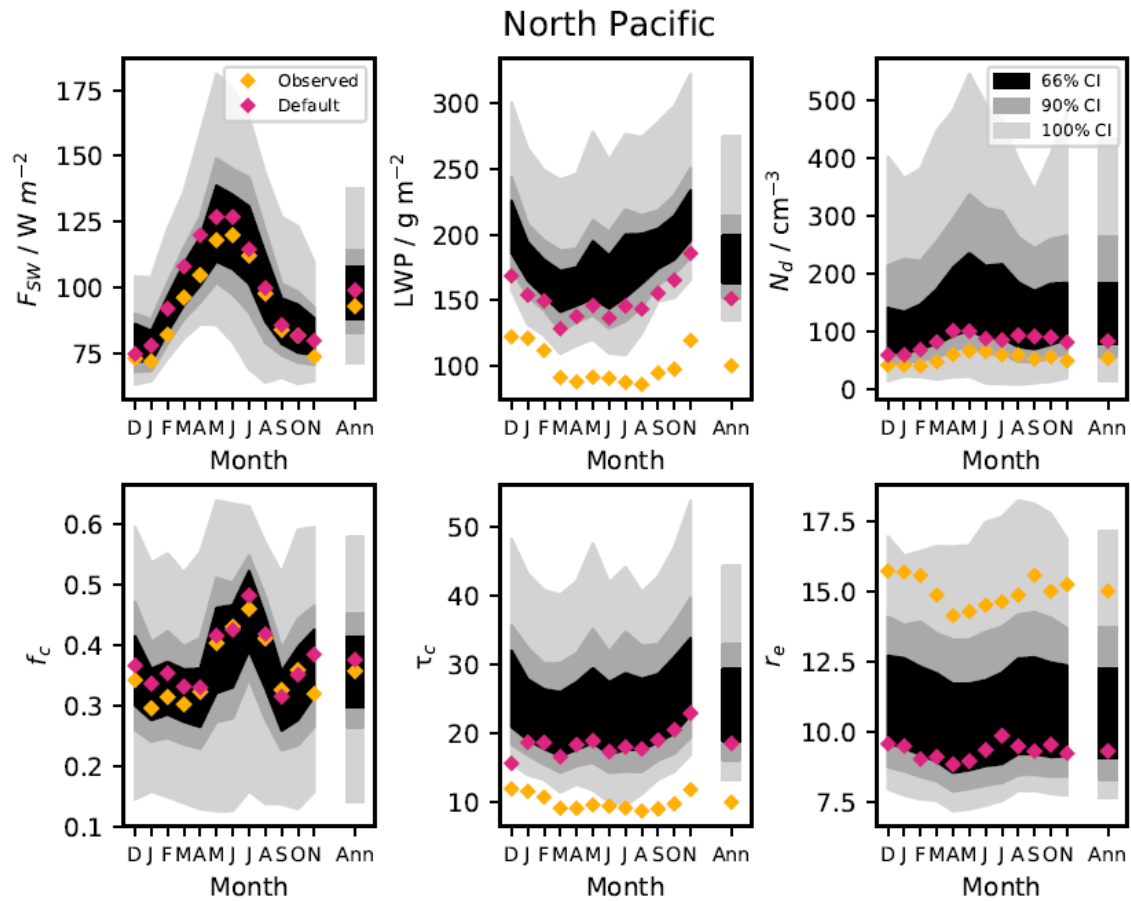

**Fig. S27: Probability distributions of North Pacific regional mean output from our sample of model variants, satellite-derived measurements and the default UKESM1-A model, for individual months spanning December 2016 to November 2017 and the annual mean.**

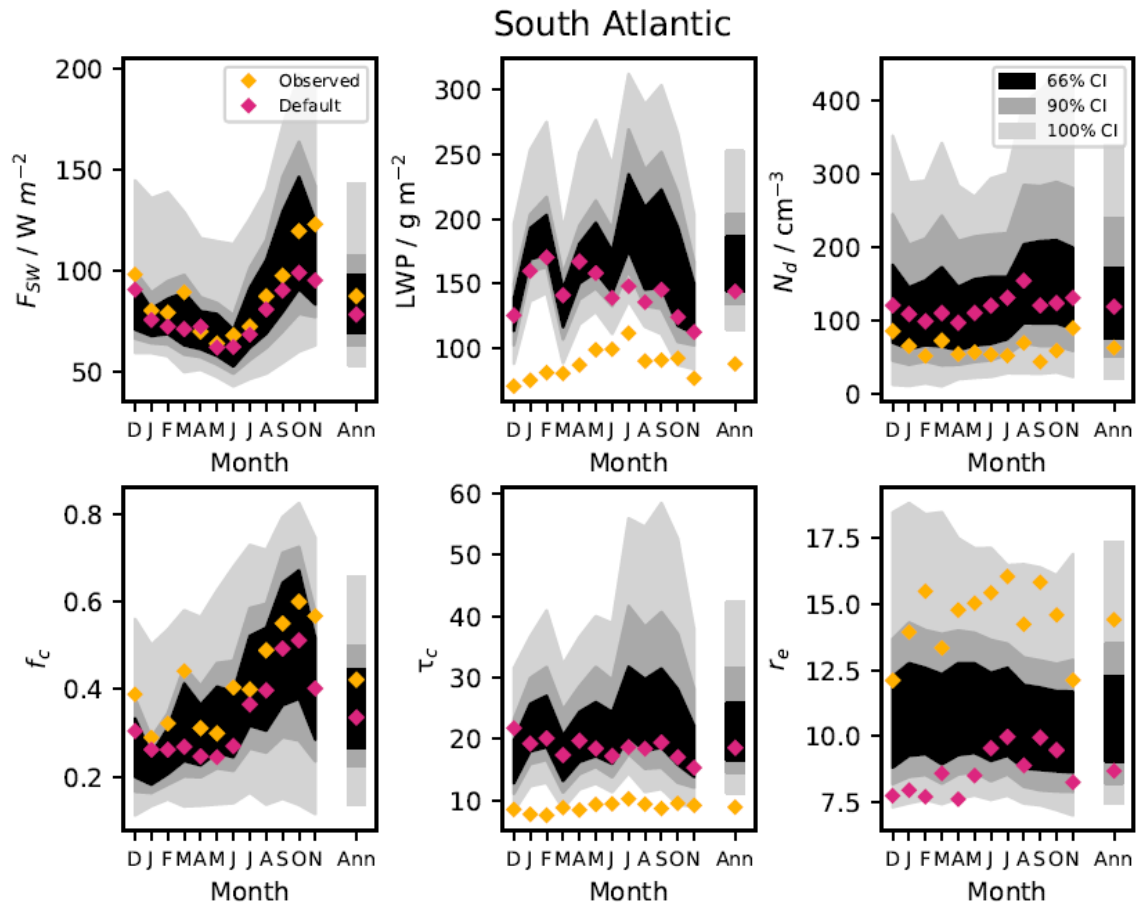

**Fig. S28: Probability distributions of South Atlantic regional mean output from our sample of model variants, satellite-derived measurements and the default UKESM1-A model, for individual months spanning December 2016 to November 2017 and the annual mean.**

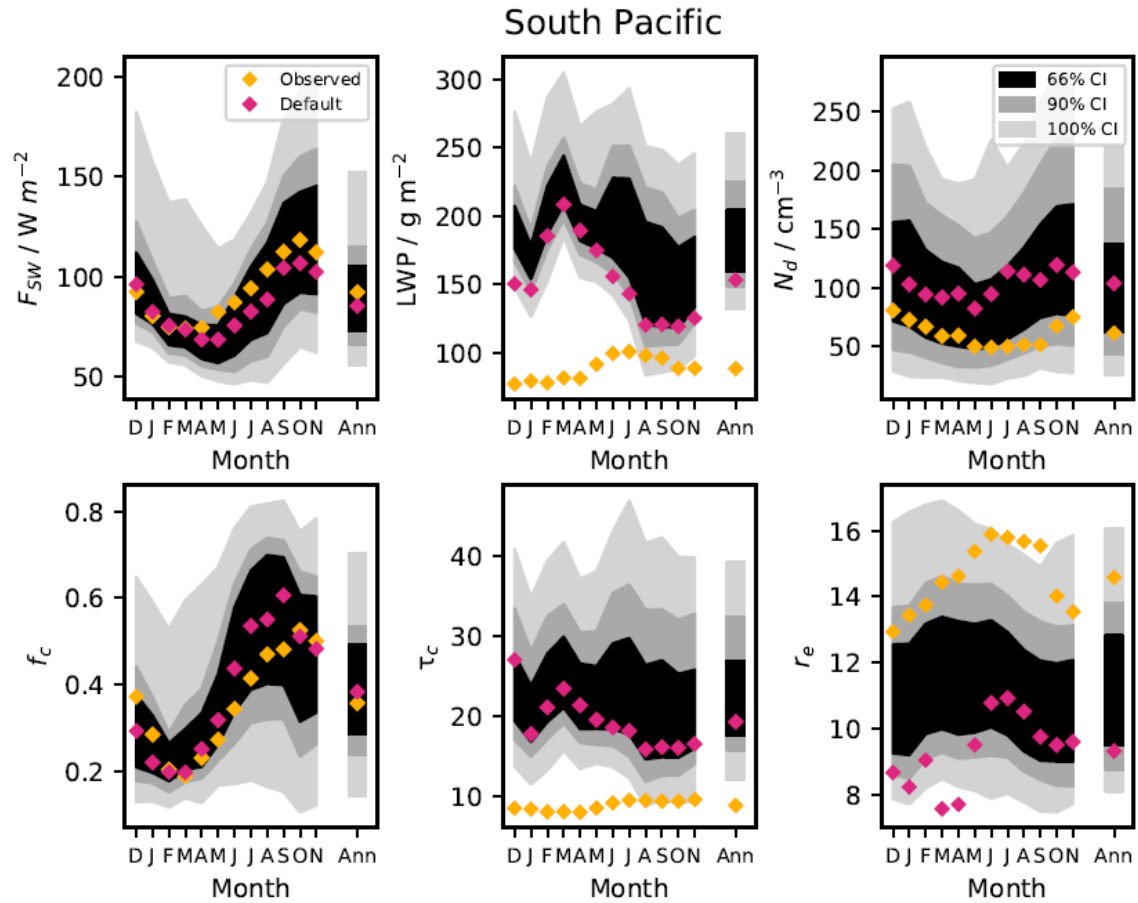

**Fig. S29: Probability distributions of South Pacific regional mean output from our sample of model variants, satellite-derived measurements and the default UKESM1-A model, for individual months spanning December 2016 to November 2017 and the annual mean.**

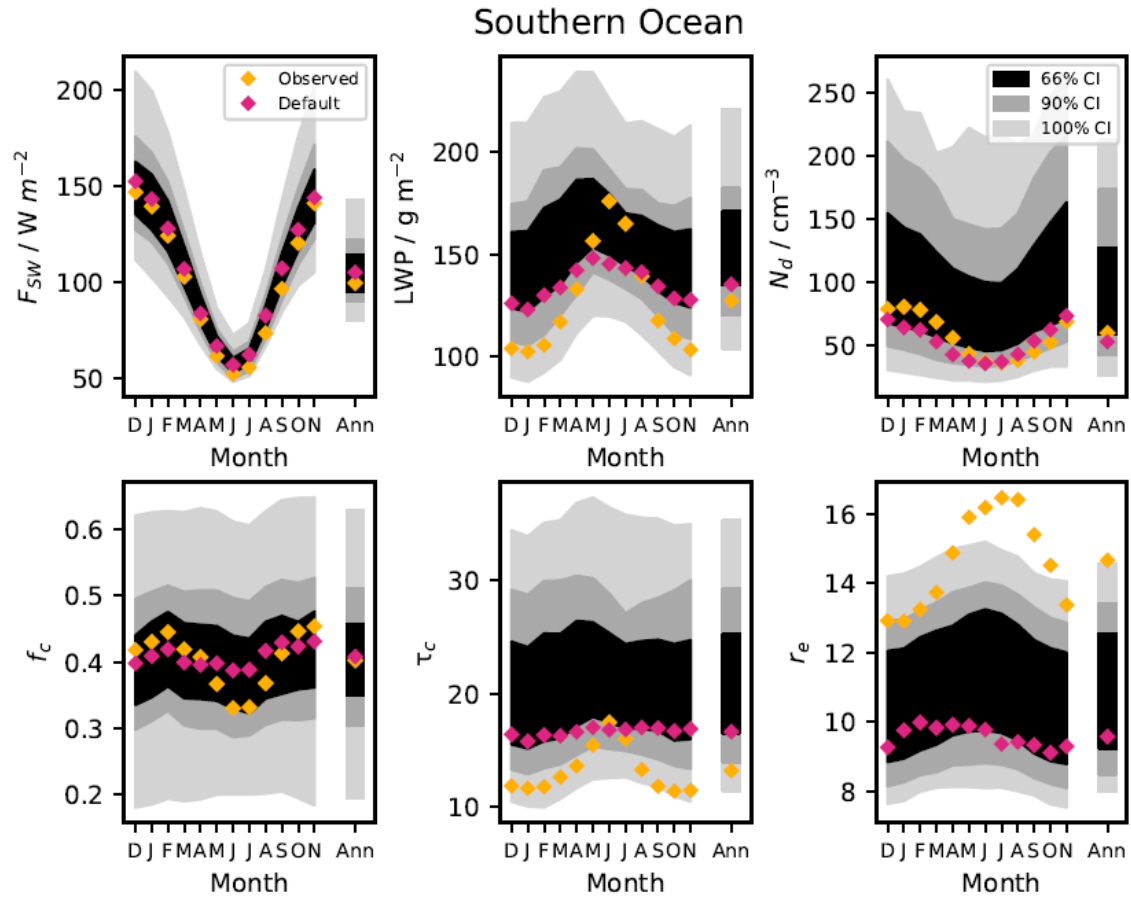

**Fig. S30: Probability distributions of Southern Ocean regional mean output from our sample of model variants, satellite-derived measurements and the default UKESM1-A model, for individual months spanning December 2016 to November 2017 and the annual mean.**



**Table S1.** Parameters perturbed in our PPE, the ranges they were perturbed over and default values as prescribed in the release version of the model. Parameters highlighted in bold are associated with recent model structural developments. For parameters described as “scale factors”, we perturbed values by scaling the default process parameter value up or down over the indicated range. All other parameters are specific values within the corresponding process parametrizations.

| Parameter              | Minimum | Maximum | Default | Parameter Description                                                                                                                                          |
|------------------------|---------|---------|---------|----------------------------------------------------------------------------------------------------------------------------------------------------------------|
| bl_nuc                 | 0.1     | 10      | 1       | Boundary layer nucleation rate scale factor                                                                                                                    |
| ait_width              | 1.2     | 1.8     | 1.59    | Modal width of Aitken modes (nm)                                                                                                                               |
| cloud_ph               | 1e-7    | 2.51e-5 | 1e-5    | Cloud droplet pH                                                                                                                                               |
| carb_ff_diam           | 30      | 90      | 60      | Emission diameter of carbonaceous aerosol from fossil fuel sources (nm)                                                                                        |
| carb_bb_diam           | 90      | 300     | 110     | Emission diameter of carbonaceous aerosol from biomass burning sources (nm)                                                                                    |
| carb_res_diam          | 90      | 500     | 150     | Emission diameter of carbonaceous aerosol from residential sources (nm)                                                                                        |
| prim_so4_diam          | 3       | 100     | 150     | Emission diameter of 50% of new sub-grid sulfate particles (nm). Remaining 50% emitted into the larger coarse mode (nm)                                        |
| sea_spray              | 0.25    | 4       | 1       | Sea spray emission flux scale factor                                                                                                                           |
| anth_so2               | 0.6     | 1.5     | 1       | Anthropogenic SO <sub>2</sub> emission flux scale factors. Applied independently to European, North American, Chinese, Asian regions and the rest of the world |
| volc_so2               | 0.71    | 2.38    | 1       | Volcanic SO <sub>2</sub> emission flux scale factor                                                                                                            |
| bvoc_soa               | 0.32    | 3.68    | 1       | Biogenic monoterpene production rate of secondary organic aerosol scale factor                                                                                 |
| dms                    | 0.33    | 3       | 1       | Dimethyl-sulfide emission flux scale factor                                                                                                                    |
| <b>prim_moc</b>        | 0.4     | 6       | 1       | Primary marine organic carbon emission flux scale factor                                                                                                       |
| dry_dep_ait            | 0.5     | 2       | 1       | Dry deposition velocity of Aitken mode aerosol                                                                                                                 |
| dry_dep_acc            | 0.1     | 10      | 1       | Dry deposition velocity of accumulation mode aerosol                                                                                                           |
| dry_dep_so2            | 0.2     | 5       | 1       | Dry deposition velocity of SO <sub>2</sub>                                                                                                                     |
| kappa_oc               | 0.2     | 0.65    | 0.65    | Hygroscopicity parameter $\kappa$ for organic aerosol – affects wet diameter and clear-sky radiative flux                                                      |
| sig_w                  | 0.25    | 1.75    | 1       | Standard deviation of shallow-cloud updraft velocity scale factor                                                                                              |
| rain_frac              | 0.3     | 0.7     | 0.3     | Fraction of cloud covered area where rain forms                                                                                                                |
| cloud_ice_thresh       | 0.1     | 0.5     | N/A     | Threshold of cloud ice water fraction for scavenging                                                                                                           |
| <b>conv_plume_scav</b> | 0       | 0.5     | 0.5     | Scavenging efficiency (as a fraction of total aerosol removed) of Aitken mode aerosol in convective clouds                                                     |
| bc_ri                  | 0.2     | 0.8     | 0.565   | Imaginary part of the black carbon refractive index                                                                                                            |

|                  |       |       |         |                                                                                                                                           |
|------------------|-------|-------|---------|-------------------------------------------------------------------------------------------------------------------------------------------|
| oxidant_oh       | 0.7   | 1.3   | 1       | Offline oxidant OH concentration scale factor                                                                                             |
| oxidants_o3      | 0.7   | 1.3   | 1       | Offline oxidant O <sub>3</sub> concentration scale factor                                                                                 |
| <b>bparam</b>    | -0.15 | -0.13 | -0.14   | Coefficient of the spectral shape parameter $\beta$ for effective radius                                                                  |
| two_d_fsd_factor | 1     | 2     | 1.4     | Scale factor for the 2D relationship between cloud condensate variance, cloud cover and convection. Controls sub-grid cloud heterogeneity |
| c_r_correl       | 0     | 1     | 0.9     | Cloud and rain sub-grid horizontal spatial colocation                                                                                     |
| autoconv_exp_lwp | 2.15  | 3.31  | 2.47    | Exponent of liquid water path in the power law for initiating autoconversion                                                              |
| autoconv_exp_nd  | -3    | -1    | -1.79   | Exponent of cloud droplet concentration ( $N_a$ ) in the power law for initiating autoconversion                                          |
| dbsdtbd_turb_0   | 0     | 1e-3  | 1.5e-4  | Cloud erosion rate ( $s^{-1}$ )                                                                                                           |
| ai               | 0     | 5e-2  | 2.57e-2 | Scaling coefficient for the dependence of ice mass on diameter                                                                            |
| m_ci             | 0     | 3     | 1       | Ice fallspeed scale factor                                                                                                                |
| a_ent_1_rp       | 0     | 0.5   | 0.23    | Cloud top entrainment rate scale factor                                                                                                   |

**Table S2.** Regions of persistent stratocumulus cloud used to calculate regional mean constraint variables.

| Region         | Latitude range   | Longitude range    |
|----------------|------------------|--------------------|
| North Atlantic | 34.4° to 54.4° N | 329.1° to 347.8° E |
| North Pacific  | 14.4° to 48.1° N | 197.8° to 231.6° E |
| South Atlantic | 30.6° to 10.6° S | 347.8° to 2.8° E   |
| South Pacific  | 30.6° to 15.6° S | 254.1° to 284.1° E |
| Southern Ocean | 30.6° to 50.6° S | 0° to 360° E       |

**Table S3.** Transects from stratocumulus- to cumulus-dominated regions.

| Region         | Start position    | End position      |
|----------------|-------------------|-------------------|
| North Atlantic | 54.4° N, 336.6° E | 45.6° N, 330.9° E |
| North Pacific  | 30.6° N, 229.7° E | 19.4° N, 227.8° E |
| South Atlantic | 11.9° S, 357.2° E | 11.9° S, 345.9° E |
| South Pacific  | 20.6° S, 282.2° E | 15.6° S, 269.1° E |

**Table S4.** Effect of varying the number of model variants retained at each stage of constraint. We show the number of constraint variables needed to optimally constrain  $\Delta F_{\text{aer}}$  and the 90% CI in each case.

| Number of model variants retained | Number of measurements used | Lower, negative $\Delta F_{\text{aer}}$ bound | Upper $\Delta F_{\text{aer}}$ bound |
|-----------------------------------|-----------------------------|-----------------------------------------------|-------------------------------------|
| 1000                              | 27                          | -1.15                                         | -0.07                               |
| 2000                              | 31                          | -1.23                                         | -0.10                               |
| 5000                              | 13                          | -1.26                                         | -0.13                               |
| 10000                             | 29                          | -1.30                                         | -0.13                               |
| 20000                             | 15                          | -1.33                                         | -0.13                               |
